# Supplementary material for: FGD5-AS1 is an oncogenic lncRNA in pancreatic cancer and regulates the Wnt/β-catenin signaling pathway via miR-577
Source: PubMed Central journal article supplement (PMC8630524; doi:10.3892/or.2021.8232), 2021-11-24
Supplement: Supplementary_Data1.pdf [file Supplementary_Data1.pdf]

Figure S1. Both starBase database and LncBase Predict v.2 database predicted that miR-577 was a target of FGD5-AS1. Lnc, long non-coding; miR, microRNA.

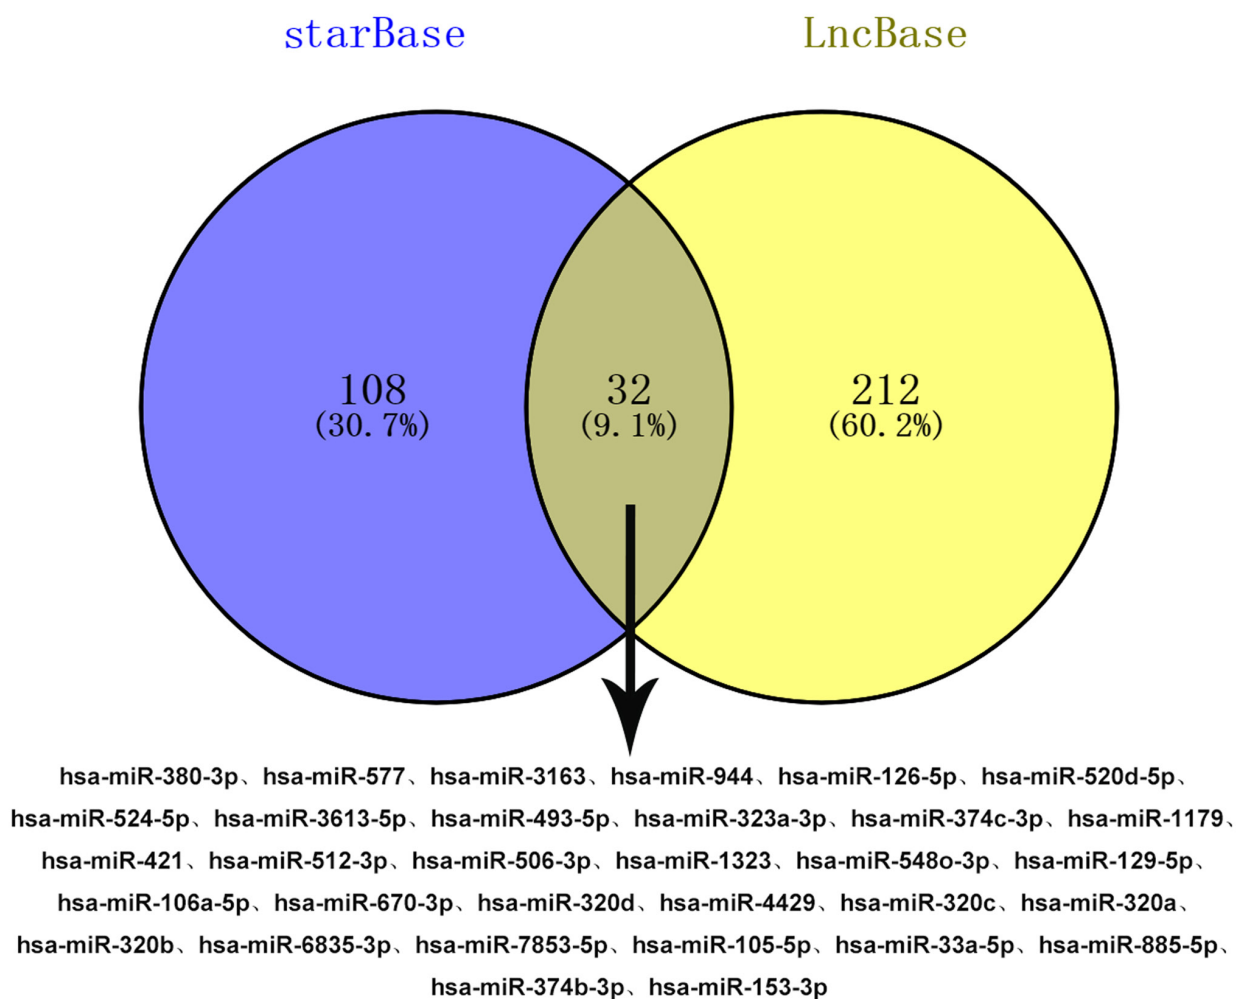

Figure S2. The expression levels of miR-577 in SW1990 cells transfected with miR-577 mimic. \*\*\*P<0.001. miR, microRNA.

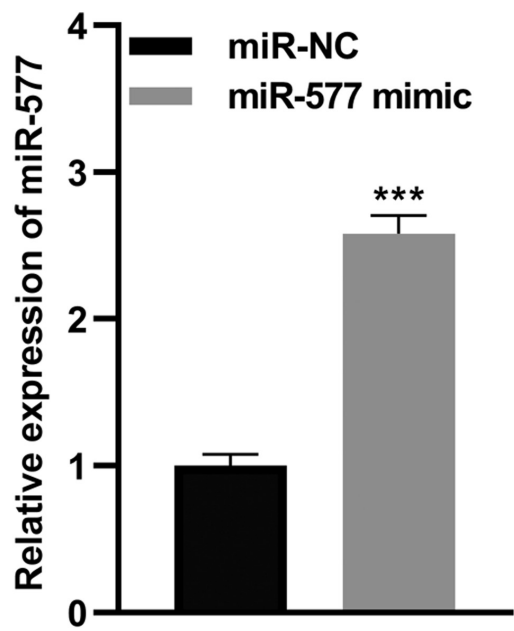

Figure S3. FGD5-AS1 regulates the metastasis of SW1990 cells *in vivo*, which was evaluated by hematoxylin and eosin staining. si-, small interfering.

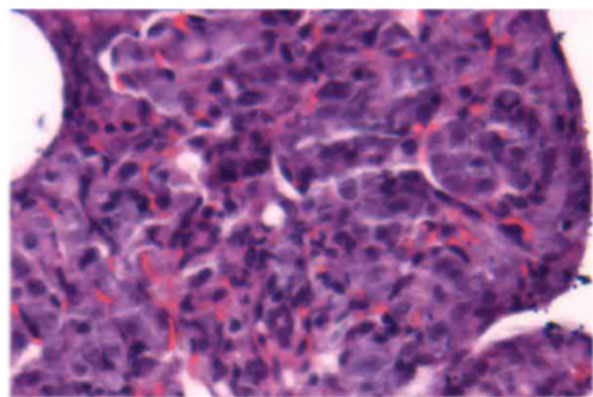

**si-NC**

**x200**

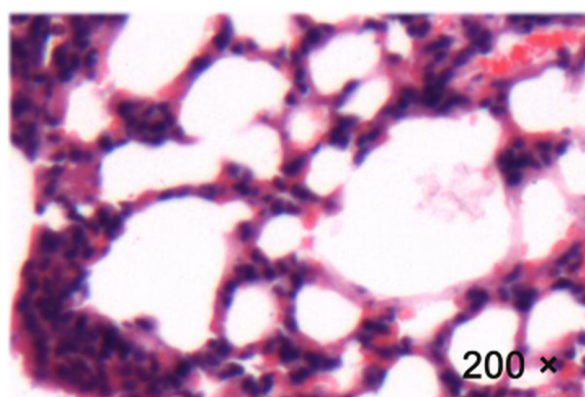

**si-FGD5-AS1**

**x200**
