# Supplementary material for: FGD5-AS1 is an oncogenic lncRNA in pancreatic cancer and regulates the Wnt/β-catenin signaling pathway via miR-577
Source: PubMed Central journal article supplement (PMC8630524; doi:10.3892/or.2021.8232), 2021-11-24
Supplement: Supplementary_Data4.pdf [file Supplementary_Data4.pdf]

Table SIII. Pathological evaluation of the severity of lung metastasis of SW1990 cells in nude mice.

| Lung metastasis          | Severe | Moderate | Mild | P-value |
|--------------------------|--------|----------|------|---------|
| si-NC group (n=10)       | 6      | 3        | 1    | 0.016   |
| si-FGD5-AS1 group (n=10) | 1      | 2        | 7    |         |

si-, small interfering; NC, negative control.
