# Supplementary material for: FGD5-AS1 is an oncogenic lncRNA in pancreatic cancer and regulates the Wnt/β-catenin signaling pathway via miR-577
Source: Oncol Rep. 2021 Nov 24;47(1):21. doi: 10.3892/or.2021.8232 (PMC8630524; doi:10.3892/or.2021.8232)
Supplement: Supporting Data [file Supplementary_Data2.xlsx]

## Sheet: Table SI
Table SI. Target miRNAs of FGD5-AS1 predicted by starBase database [adapted from Ref. (44)].
miRNAid	miRNAname	geneID	geneName	geneType	chromosome	start	end	strand	clipExpNum	degraExpNum	RBP	merClass	miRseq	align	targetSeq	pancancerNum
MIMAT0000735	hsa-miR-380-3p	ENSG00000225733	FGD5-AS1	antisense	chr3	14984317	14984336	-	4	0	AGO1-4,AGO2	7mer-m8	uucUACACCUGGUAUAAUGUAu	|| || | || |||||||	aucAUUUGUA-CA-AUUACAUg	2
MIMAT0003242	hsa-miR-577	ENSG00000225733	FGD5-AS1	antisense	chr3	14984349	14984370	-	6	0	AGO1,AGO1-4,AGO2	7mer-m8	gucCAUGGUUA-UAAAAUAGAu	||||:||| |||||||||	uauGUACUAAUAAUUUUAUCUg	4
MIMAT0015037	hsa-miR-3163	ENSG00000225733	FGD5-AS1	antisense	chr3	14984351	14984370	-	5	0	AGO1,AGO1-4,AGO2	7mer-m8	cagaAUGACGGGAGUAAAAUAu	|||| | |||||||	uaugUACU--AAUAAUUUUAUc	1
MIMAT0004987	hsa-miR-944	ENSG00000225733	FGD5-AS1	antisense	chr3	14984355	14984377	-	5	0	AGO1,AGO1-4,AGO2	7mer-m8	gaguaggcUACAUG-UUAUUAAa	|||||| |||||||	uacuauauAUGUACUAAUAAUUu	7
MIMAT0000444	hsa-miR-126-5p	ENSG00000225733	FGD5-AS1	antisense	chr3	14984356	14984376	-	5	0	AGO1,AGO1-4,AGO2	7mer-m8	gcgcAUGGUUUUCAUUAUUAc	||: : | |||||||	acuaUAUAUGUACUAAUAAUu	7
MIMAT0002855	hsa-miR-520d-5p	ENSG00000225733	FGD5-AS1	antisense	chr3	14984407	14984426	-	8	0	AGO1,AGO1-4,AGO2	7mer-m8	cuuucccgaaggGAAACAUc	|||||||	acuuauguacaaCUUUGUAu	1
MIMAT0002849	hsa-miR-524-5p	ENSG00000225733	FGD5-AS1	antisense	chr3	14984407	14984434	-	8	0	AGO1,AGO1-4,AGO2	7mer-m8	cucuUUCACGAAGG------GAAACAUc	|||| ||| : |||||||	uuacAAGUACUUAUGUACAACUUUGUAu	3
MIMAT0000737	hsa-miR-382-5p	ENSG00000225733	FGD5-AS1	antisense	chr3	14984411	14984431	-	8	0	AGO1,AGO1-4,AGO2	7mer-m8	gcUUAGGUGGUGCUUGUUGAAg	|:| | ::|:| |||||||	caAGUAC-UUAUGUACAACUUu	7
MIMAT0017990	hsa-miR-3613-5p	ENSG00000225733	FGD5-AS1	antisense	chr3	14984413	14984434	-	8	0	AGO1,AGO1-4,AGO2	7mer-m8	cuUGUUUUUUUUUUCAUGUUGu	||||: | | |||||||	uuACAAGUACUUAUGUACAACu	14
MIMAT0002813	hsa-miR-493-5p	ENSG00000225733	FGD5-AS1	antisense	chr3	14984415	14984435	-	8	0	AGO1,AGO1-4,AGO2	8mer	uuacuUUCGGAUG-GUACAUGUu	||| ||| :|||||||	uuuacAAG--UACUUAUGUACAa	7
MIMAT0016895	hsa-miR-2355-5p	ENSG00000225733	FGD5-AS1	antisense	chr3	14984447	14984465	-	5	0	AGO1,AGO1-4	8mer	aacaGGUAACAUAGACCCCUa	|||| | | |||||||	auucCCAUAG-A-CUGGGGAa	9
MIMAT0000755	hsa-miR-323a-3p	ENSG00000225733	FGD5-AS1	antisense	chr3	14984489	14984509	-	10	0	AGO1-4,AGO2	8mer	ucuccagcuggcACAUUACAc	||||||||	guuuuccuuuuuUGUAAUGUa	5
MIMAT0018358	hsa-miR-3942-5p	ENSG00000225733	FGD5-AS1	antisense	chr3	14984530	14984551	-	13	0	AGO1,AGO1-4,AGO2,AGO3	7mer-m8	uaaaguccAUUGUCAUAACGAa	||| :||||||||	uuuacuuuUAAGGGUAUUGCUu	2
MIMAT0019801	hsa-miR-4703-5p	ENSG00000225733	FGD5-AS1	antisense	chr3	14984530	14984553	-	13	0	AGO1,AGO1-4,AGO2,AGO3	7mer-m8	ugAUAU-AAACAUGACAUAACGAu	| || ||| | ||||||||	uuUUUACUUUUAAGGGUAUUGCUu	0
MIMAT0022735	hsa-miR-374c-3p	ENSG00000225733	FGD5-AS1	antisense	chr3	14984584	14984604	-	6	0	AGO1,AGO1-4,AGO2	7mer-m8	uaUAUUAUGUUGGACGAUUCAc	:| :|| :|: ||||||||	uaGUUGUA-GAUAUGCUAAGUu	1
MIMAT0015085	hsa-miR-3200-3p	ENSG00000225733	FGD5-AS1	antisense	chr3	14984663	14984686	-	7	0	AGO1-4,AGO2	7mer-m8	gucUGGACUCAUCG--CGUUCCAc	|| || |: | |||||||	uaaACAUGUUUGCCAUGCAAGGUu	2
MIMAT0022714	hsa-miR-766-5p	ENSG00000225733	FGD5-AS1	antisense	chr3	14984813	14984835	-	4	0	AGO1-4,AGO2	8mer	uuCU-GGUCGUGGUUAAGGAGGa	|| |||| : |||||||	gaGACCCAGGUGUUCUUCCUCCa	3
MIMAT0005824	hsa-miR-1179	ENSG00000225733	FGD5-AS1	antisense	chr3	14984923	14984943	-	9	1	AGO1-4,AGO2	7mer-m8	ggUUGGUUACUUUCUUACGAa	| |:: |||| |||||||	gcAUCUGUUGAAUGAAUGCUu	2
MIMAT0003339	hsa-miR-421	ENSG00000225733	FGD5-AS1	antisense	chr3	14984932	14984954	-	10	0	AGO1-4,AGO2	8mer	cgcggGUUAAUUACAGACAACUa	:|:| :: ||||||||	guaugUAGUGGGCAUCUGUUGAa	5
MIMAT0000226	hsa-miR-196a-5p	ENSG00000225733	FGD5-AS1	antisense	chr3	14984962	14984984	-	18	2	AGO1,AGO1-4,AGO2	7mer-m8	ggGUUGU-UGUACUUUGAUGGAu	||:|| :| | |||||||	uuCAGCACUUAACACACUACCUg	2
MIMAT0001080	hsa-miR-196b-5p	ENSG00000225733	FGD5-AS1	antisense	chr3	14984962	14984984	-	18	2	AGO1,AGO1-4,AGO2	7mer-m8	ggGUUGU-UGUCCUUUGAUGGAu	||:|| :| | |||||||	uuCAGCACUUAACACACUACCUg	1
MIMAT0000434	hsa-miR-142-3p	ENSG00000225733	FGD5-AS1	antisense	chr3	14984964	14984986	-	18	2	AGO1,AGO1-4,AGO2	7mer-m8	agguauuucauccUUUGUGAUGu	| |||||||	guuucagcacuuaACACACUACc	12
MIMAT0005931	hsa-miR-302e	ENSG00000225733	FGD5-AS1	antisense	chr3	14984974	14984990	-	18	2	AGO1,AGO1-4,AGO2	8mer	uucguaccuUCGUGAAu	|||||||	cccuguuucAGCACUUa	0
MIMAT0000726	hsa-miR-373-3p	ENSG00000225733	FGD5-AS1	antisense	chr3	14984974	14984994	-	19	2	AGO1,AGO1-4,AGO2	8mer	uguGGGGUUUUAGCUUCGUGAAg	:||| : || |||||||	ccuUCCCUGUUUC--AGCACUUa	2
MIMAT0002825	hsa-miR-520e	ENSG00000225733	FGD5-AS1	antisense	chr3	14984974	14984994	-	19	2	AGO1,AGO1-4,AGO2	8mer	gggaguuuuuccuUCGUGAAa	|||||||	ccuucccuguuucAGCACUUa	3
MIMAT0002843	hsa-miR-520b	ENSG00000225733	FGD5-AS1	antisense	chr3	14984974	14984994	-	19	2	AGO1,AGO1-4,AGO2	8mer	gggagauuuuccuUCGUGAAa	|||||||	ccuucccuguuucAGCACUUa	3
MIMAT0002834	hsa-miR-520a-3p	ENSG00000225733	FGD5-AS1	antisense	chr3	14984974	14984995	-	19	2	AGO1,AGO1-4,AGO2	8mer	ugucagguuucccuUCGUGAAa	|||||||	uccuucccuguuucAGCACUUa	3
MIMAT0002846	hsa-miR-520c-3p	ENSG00000225733	FGD5-AS1	antisense	chr3	14984974	14984995	-	19	2	AGO1,AGO1-4,AGO2	8mer	ugggagauuuuccuUCGUGAAa	|||||||	uccuucccuguuucAGCACUUa	3
MIMAT0002856	hsa-miR-520d-3p	ENSG00000225733	FGD5-AS1	antisense	chr3	14984974	14984995	-	19	2	AGO1,AGO1-4,AGO2	8mer	ugggugguuucucuUCGUGAAa	|||||||	uccuucccuguuucAGCACUUa	1
MIMAT0000684	hsa-miR-302a-3p	ENSG00000225733	FGD5-AS1	antisense	chr3	14984974	14984996	-	19	1	AGO1,AGO1-4,AGO2	8mer	agugguuuuguaccuUCGUGAAu	|||||||	guccuucccuguuucAGCACUUa	2
MIMAT0000715	hsa-miR-302b-3p	ENSG00000225733	FGD5-AS1	antisense	chr3	14984974	14984996	-	19	2	AGO1,AGO1-4,AGO2	8mer	gaugauuuuguaccuUCGUGAAu	|||||||	guccuucccuguuucAGCACUUa	1
MIMAT0000717	hsa-miR-302c-3p	ENSG00000225733	FGD5-AS1	antisense	chr3	14984974	14984996	-	19	2	AGO1,AGO1-4,AGO2	8mer	ggugacuuuguaccuUCGUGAAu	|||||||	guccuucccuguuucAGCACUUa	1
MIMAT0000718	hsa-miR-302d-3p	ENSG00000225733	FGD5-AS1	antisense	chr3	14984974	14984996	-	19	2	AGO1,AGO1-4,AGO2	8mer	ugugaguuuguaccuUCGUGAAu	|||||||	guccuucccuguuucAGCACUUa	2
MIMAT0000724	hsa-miR-372-3p	ENSG00000225733	FGD5-AS1	antisense	chr3	14984974	14984996	-	19	2	AGO1,AGO1-4,AGO2	8mer	ugcGAGUUUACAGCGUCGUGAAa	||: |||: ||||||||	gucCUUCCCUGUUUCAGCACUUa	2
MIMAT0002823	hsa-miR-512-3p	ENSG00000225733	FGD5-AS1	antisense	chr3	14984975	14984996	-	19	2	AGO1,AGO1-4,AGO2	7mer-m8	cuGGAGUCGAUACUGUCGUGAa	|||: ||:| |||||||	guCCUUCCCUGUUUCAGCACUu	3
MIMAT0000422	hsa-miR-124-3p	ENSG00000225733	FGD5-AS1	antisense	chr3	14984996	14985015	-	18	0	AGO1-4,AGO2	7mer-m8	ccguaaguggcGCACGGAAu	:|||||||	cccccguaggaUGUGCCUUg	4
MIMAT0002878	hsa-miR-506-3p	ENSG00000225733	FGD5-AS1	antisense	chr3	14984996	14985018	-	19	0	AGO1-4,AGO2	7mer-m8	agauGAGUCUUCC--CACGGAAu	| | | ||| |||||||	gagcCCCCGUAGGAUGUGCCUUg	3
MIMAT0018005	hsa-miR-3622b-5p	ENSG00000225733	FGD5-AS1	antisense	chr3	14985119	14985138	-	15	0	AGO1,AGO1-4,AGO2	8mer	agUGGACUGGAGGGUACGGa	| || ::| |||||||	uuAACUCUUUUACCAUGCCa	1
MIMAT0018939	hsa-miR-4424	ENSG00000225733	FGD5-AS1	antisense	chr3	14985131	14985152	-	10	0	AGO1,AGO1-4,AGO2	7mer-m8	aucAGGUAAAACUCAAUUGAGa	|: | | |||||||||	cuuUUGAAAUACAGUUAACUCu	1
MIMAT0005795	hsa-miR-1323	ENSG00000225733	FGD5-AS1	antisense	chr3	14985158	14985179	-	4	0	AGO1-4,AGO2	7mer-m8	ucuuuuacggggagUCAAAACu	|||||||	aacaaagcaaaaaaAGUUUUGu	1
MIMAT0005919	hsa-miR-548o-3p	ENSG00000225733	FGD5-AS1	antisense	chr3	14985158	14985179	-	4	0	AGO1-4,AGO2	7mer-m8	cguUUUCAUUGACGUCAAAACc	|||| || |||||||	aacAAAGCAAAAAAAGUUUUGu	2
MIMAT0000242	hsa-miR-129-5p	ENSG00000225733	FGD5-AS1	antisense	chr3	14985166	14985187	-	4	0	AGO1-4,AGO2	8mer	cgUUCG-GGUCUGGCGUUUUUc	| || : | | |||||||	acAUGCAUAACAAAGCAAAAAa	3
MIMAT0021086	hsa-miR-5094	ENSG00000225733	FGD5-AS1	antisense	chr3	14985196	14985220	-	3	0	AGO1-4,AGO2	7mer-m8	uccaAGUUCCG---UAAGUGACUAa	|| |||| | |||||||	auacUCCAGGCCUGAACCACUGAUc	3
MIMAT0000431	hsa-miR-140-5p	ENSG00000225733	FGD5-AS1	antisense	chr3	14985199	14985220	-	3	0	AGO1-4,AGO2	7mer-m8	gaUGGUAUCCCAUUUUGGUGAc	||: ||| :|||||||	auACUCCAGGCCUGAACCACUg	8
MIMAT0011159	hsa-miR-2115-3p	ENSG00000225733	FGD5-AS1	antisense	chr3	14985222	14985245	-	7	0	AGO1,AGO1-4,AGO2	7mer-m8	gaUCGGAG-GU-ACUUAAGACUAc	|||:|| || |||||||||	uaAGCUUCACAGAUAAUUCUGAUg	3
MIMAT0017988	hsa-miR-3611	ENSG00000225733	FGD5-AS1	antisense	chr3	14985234	14985258	-	8	0	AGO1,AGO1-4,AGO2	7mer-m8	auUC-UUAAAGAAA---GAAGUGUu	|| | |||| | |||||||	ucAGCACUUUCACUAAGCUUCACAg	5
MIMAT0000075	hsa-miR-20a-5p	ENSG00000225733	FGD5-AS1	antisense	chr3	14985248	14985268	-	8	0	AGO1,AGO1-4,AGO2	7mer-m8	gauGGACGUGAUAUUCGUGAAAu	:||| :| || ||||||||	ggcUCUG-GC-AUCAGCACUUUc	8
MIMAT0000093	hsa-miR-93-5p	ENSG00000225733	FGD5-AS1	antisense	chr3	14985248	14985268	-	8	0	AGO1,AGO1-4,AGO2	7mer-m8	gauGGACGUGCUUGUCGUGAAAc	:||| :| | |||||||||	ggcUCUG-GC-AUCAGCACUUUc	7
MIMAT0001413	hsa-miR-20b-5p	ENSG00000225733	FGD5-AS1	antisense	chr3	14985248	14985268	-	8	0	AGO1,AGO1-4,AGO2	7mer-m8	gauGGACGUGAUACUCGUGAAAc	:||| :| || ||||||||	ggcUCUG-GC-AUCAGCACUUUc	5
MIMAT0002836	hsa-miR-526b-3p	ENSG00000225733	FGD5-AS1	antisense	chr3	14985248	14985268	-	8	0	AGO1,AGO1-4,AGO2	7mer-m8	cgGAGAUUUUCCUUCGUGAAAg	||||:: | ||||||||	ggCUCUGGCA-UCAGCACUUUc	2
MIMAT0002853	hsa-miR-519d-3p	ENSG00000225733	FGD5-AS1	antisense	chr3	14985248	14985268	-	8	0	AGO1,AGO1-4,AGO2	7mer-m8	guGAGAUUUCCCUCCGUGAAAc	||||:: | |||||||	ggCUCUGGCAUCA-GCACUUUc	4
MIMAT0000680	hsa-miR-106b-5p	ENSG00000225733	FGD5-AS1	antisense	chr3	14985248	14985271	-	8	0	AGO1,AGO1-4,AGO2	7mer-m8	uagaCGUGAC---AGUCGUGAAAu	|| ||| ||||||||||	guggGCUCUGGCAUCAGCACUUUc	10
MIMAT0000070	hsa-miR-17-5p	ENSG00000225733	FGD5-AS1	antisense	chr3	14985248	14985273	-	8	0	AGO1,AGO1-4,AGO2	7mer-m8	gauggaCGUGAC---AUUCGUGAAAc	|| ||| | ||||||||	ggguggGCUCUGGCAUCAGCACUUUc	11
MIMAT0000103	hsa-miR-106a-5p	ENSG00000225733	FGD5-AS1	antisense	chr3	14985248	14985273	-	8	0	AGO1,AGO1-4,AGO2	7mer-m8	gauggaCGUGAC---AUUCGUGAAAa	|| ||| | ||||||||	ggguggGCUCUGGCAUCAGCACUUUc	7
MIMAT0005931	hsa-miR-302e	ENSG00000225733	FGD5-AS1	antisense	chr3	14985249	14985263	-	8	0	AGO1,AGO1-4,AGO2	7mer-m8	uuCGUACCUUCGUGAAu	|||| |||||||	ugGCAU--CAGCACUUu	0
MIMAT0002825	hsa-miR-520e	ENSG00000225733	FGD5-AS1	antisense	chr3	14985249	14985268	-	8	0	AGO1,AGO1-4,AGO2	7mer-m8	ggGAGUUUUUCCUUCGUGAAa	||| :: | |||||||	ggCUCUGGCA-UCAGCACUUu	3
MIMAT0002843	hsa-miR-520b	ENSG00000225733	FGD5-AS1	antisense	chr3	14985249	14985268	-	8	0	AGO1,AGO1-4,AGO2	7mer-m8	ggGAGAUUUUCCUUCGUGAAa	||||:: | |||||||	ggCUCUGGCA-UCAGCACUUu	3
MIMAT0000684	hsa-miR-302a-3p	ENSG00000225733	FGD5-AS1	antisense	chr3	14985249	14985269	-	8	0	AGO1,AGO1-4,AGO2	7mer-m8	agUGGUUUUGUACCUUCGUGAAu	:|: ::||| |||||||	ggGCUCUGGCAU--CAGCACUUu	2
MIMAT0000715	hsa-miR-302b-3p	ENSG00000225733	FGD5-AS1	antisense	chr3	14985249	14985269	-	8	0	AGO1,AGO1-4,AGO2	7mer-m8	gaUGAUUUUGUACCUUCGUGAAu	:|| ::||| |||||||	ggGCUCUGGCAU--CAGCACUUu	1
MIMAT0000717	hsa-miR-302c-3p	ENSG00000225733	FGD5-AS1	antisense	chr3	14985249	14985269	-	8	0	AGO1,AGO1-4,AGO2	7mer-m8	ggUGACUUUGUACCUUCGUGAAu	:|| ::||| |||||||	ggGCUCUGGCAU--CAGCACUUu	1
MIMAT0000718	hsa-miR-302d-3p	ENSG00000225733	FGD5-AS1	antisense	chr3	14985249	14985269	-	8	0	AGO1,AGO1-4,AGO2	7mer-m8	ugUGAGUUUGUACCUUCGUGAAu	:||| ::||| |||||||	ggGCUCUGGCAU--CAGCACUUu	2
MIMAT0000724	hsa-miR-372-3p	ENSG00000225733	FGD5-AS1	antisense	chr3	14985249	14985269	-	8	0	AGO1,AGO1-4,AGO2	7mer-m8	ugCGAGUUUACAGCGUCGUGAAa	|||| :: | ||||||||	ggGCUCUGGCAU--CAGCACUUu	2
MIMAT0000726	hsa-miR-373-3p	ENSG00000225733	FGD5-AS1	antisense	chr3	14985249	14985269	-	8	0	AGO1,AGO1-4,AGO2	7mer-m8	ugUGGGGUUUUAGCUUCGUGAAg	:|:|::: ||| |||||||	ggGCUCUGGCAUC--AGCACUUu	2
MIMAT0002846	hsa-miR-520c-3p	ENSG00000225733	FGD5-AS1	antisense	chr3	14985249	14985269	-	8	0	AGO1,AGO1-4,AGO2	7mer-m8	uggGAGAUUUUCCUUCGUGAAa	||||:: | |||||||	gggCUCUGGCA-UCAGCACUUu	3
MIMAT0002834	hsa-miR-520a-3p	ENSG00000225733	FGD5-AS1	antisense	chr3	14985249	14985270	-	8	0	AGO1,AGO1-4,AGO2	7mer-m8	ugucagguuucccuUCGUGAAa	|||||||	ugggcucuggcaucAGCACUUu	3
MIMAT0002856	hsa-miR-520d-3p	ENSG00000225733	FGD5-AS1	antisense	chr3	14985249	14985270	-	8	0	AGO1,AGO1-4,AGO2	7mer-m8	uggguGGUUUCUCUUCGUGAAa	:| :: | |||||||	ugggcUCUGGCAUCAGCACUUu	1
MIMAT0002823	hsa-miR-512-3p	ENSG00000225733	FGD5-AS1	antisense	chr3	14985250	14985274	-	8	0	AGO1,AGO1-4,AGO2	7mer-m8	cuggAGUCGAUACU---GUCGUGAa	| :||| ||: |||||||	ugggUGGGCUCUGGCAUCAGCACUu	3
MIMAT0018108	hsa-miR-3681-5p	ENSG00000225733	FGD5-AS1	antisense	chr3	14985383	14985404	-	8	0	AGO1,AGO1-4,AGO2	7mer-m8	cgugucuCACGUAGUAGGUGAu	| | | ||||||||	uauuaauGAGGAACAUCCACUu	3
MIMAT0027598	hsa-miR-6849-5p	ENSG00000225733	FGD5-AS1	antisense	chr3	14985383	14985405	-	8	0	AGO1,AGO1-4,AGO2	7mer-m8	aggugugugaggggaUAGGUGAg	|||||||	uuauuaaugaggaacAUCCACUu	1
MIMAT0026640	hsa-miR-670-3p	ENSG00000225733	FGD5-AS1	antisense	chr3	14985391	14985411	-	8	0	AGO1,AGO1-4,AGO2	7mer-m8	aggacuuacuuaUACUCCUUu	||||||||	gaguucuuauuaAUGAGGAAc	2
MIMAT0004916	hsa-miR-888-5p	ENSG00000225733	FGD5-AS1	antisense	chr3	14985407	14985427	-	8	0	AGO1,AGO1-4,AGO2	7mer-m8	acugacugucGAAAAACUCAu	:|||||||||	cuguacuuuaUUUUUUGAGUu	2
MIMAT0000433	hsa-miR-142-5p	ENSG00000225733	FGD5-AS1	antisense	chr3	14985416	14985436	-	7	0	AGO1-4,AGO2	7mer-m8	ucaucacgaaAGAUGAAAUAc	| ||||||||	uuauacuagcUGUACUUUAUu	14
MIMAT0022300	hsa-miR-5590-3p	ENSG00000225733	FGD5-AS1	antisense	chr3	14985416	14985439	-	8	0	AGO1-4,AGO2	7mer-m8	aacGGUAUG-U--ACUUGAAAUAa	::|||| | || |||||||	gucUUAUACUAGCUGUACUUUAUu	1
MIMAT0002870	hsa-miR-499a-5p	ENSG00000225733	FGD5-AS1	antisense	chr3	14985433	14985453	-	9	0	AGO1-4,AGO2	7mer-m8	uuuguagugacGUUCAGAAUu	|||||||||	ggcacaaaaaaCAAGUCUUAu	1
MIMAT0015037	hsa-miR-3163	ENSG00000225733	FGD5-AS1	antisense	chr3	14985485	14985507	-	5	0	AGO1-4,AGO2	8mer	caGAAUGA-CGGGAGUAAAAUAu	||| :| | : |||||||	guCUUUUUGGAUAGAAUUUUAUa	1
MIMAT0003283	hsa-miR-615-3p	ENSG00000225733	FGD5-AS1	antisense	chr3	14985521	14985542	-	3	0	AGO1-4	7mer-m8	uucucccucuggguCCGAGCCu	|||||||	cuuuuuuguuuuuuGGCUCGGu	7
MIMAT0002878	hsa-miR-506-3p	ENSG00000225733	FGD5-AS1	antisense	chr3	14985539	14985559	-	3	0	AGO1-4	7mer-m8	agaugagucuucCCACGGAAu	||||||||	cggcacugcuuuGGUGCCUUu	3
MIMAT0000422	hsa-miR-124-3p	ENSG00000225733	FGD5-AS1	antisense	chr3	14985539	14985562	-	3	0	AGO1-4	7mer-m8	ccguaaGUGGCG----CACGGAAu	|||:|| |||||||	agucggCACUGCUUUGGUGCCUUu	4
MIMAT0000751	hsa-miR-330-3p	ENSG00000225733	FGD5-AS1	antisense	chr3	14985546	14985569	-	3	0	AGO1-4	7mer-m8	agaGACGUCCGGC-ACACGAAACg	:|| || | | |||||||	acaUUGAAGUCGGCACUGCUUUGg	9
MIMAT0000723	hsa-miR-371a-3p	ENSG00000225733	FGD5-AS1	antisense	chr3	14985552	14985574	-	3	0	AGO1-4	7mer-m8	ugugaguuuuCUACCGCCGUGAa	|| | |||||||	uuugcacauuGAAGUCGGCACUg	1
MIMAT0000073	hsa-miR-19a-3p	ENSG00000225733	FGD5-AS1	antisense	chr3	14985567	14985589	-	4	0	AGO1-4,AGO2	8mer	agucaaaacguaucuAAACGUGu	|||||||	agcacguaaaaggccUUUGCACa	14
MIMAT0000074	hsa-miR-19b-3p	ENSG00000225733	FGD5-AS1	antisense	chr3	14985567	14985589	-	4	0	AGO1-4,AGO2	8mer	agucaaaacgUACCUAAACGUGu	| | |||||||	agcacguaaaAGGCCUUUGCACa	13
MIMAT0019950	hsa-miR-1245b-5p	ENSG00000225733	FGD5-AS1	antisense	chr3	14985573	14985593	-	4	0	AGO1-4,AGO2	7mer-m8	aaauucacuagaUUUCCGGAu	||||||||	uaucagcacguaAAAGGCCUu	0
MIMAT0015011	hsa-miR-3142	ENSG00000225733	FGD5-AS1	antisense	chr3	14985573	14985594	-	4	0	AGO1-4,AGO2	7mer-m8	agacuuccaagucUUUCCGGAa	||||||||	auaucagcacguaAAAGGCCUu	0
MIMAT0026606	hsa-miR-511-3p	ENSG00000225733	FGD5-AS1	antisense	chr3	14985612	14985629	-	3	0	AGO1-4,AGO2	7mer-m8	agACAGAAAACGAUGUGUAa	|| | | || |||||||	gaUG-CAUAUG-UACACAUg	8
MIMAT0002813	hsa-miR-493-5p	ENSG00000225733	FGD5-AS1	antisense	chr3	14985615	14985639	-	3	0	AGO1-4,AGO2	7mer-m8	uuACUUUCG--GAUG-GUACAUGUu	||||| | |:| :|||||||	ccUGAAAACAGAUGCAUAUGUACAc	7
MIMAT0006764	hsa-miR-320d	ENSG00000225733	FGD5-AS1	antisense	chr3	14985645	14985661	-	4	1	AGO1-4,AGO2	7mer-m8	aggaGAGUUGGGUCGAAAa	:|:|| |||||||	uggcUUUAA--CAGCUUUu	3
MIMAT0018944	hsa-miR-4429	ENSG00000225733	FGD5-AS1	antisense	chr3	14985645	14985661	-	4	1	AGO1-4,AGO2	7mer-m8	gcgGAGAGUCGGGUCGAAAa	||:| | |||||||	uggCUUUAA---CAGCUUUu	0
MIMAT0005793	hsa-miR-320c	ENSG00000225733	FGD5-AS1	antisense	chr3	14985645	14985662	-	4	1	AGO1-4,AGO2	7mer-m8	ugggaGAGUUGGGUCGAAAa	:|:|| |||||||	uuggcUUUAA--CAGCUUUu	3
MIMAT0000510	hsa-miR-320a	ENSG00000225733	FGD5-AS1	antisense	chr3	14985645	14985664	-	4	1	AGO1-4,AGO2	7mer-m8	agcgggaGAGUUGGGUCGAAAa	:|:|| |||||||	aauuggcUUUAA--CAGCUUUu	9
MIMAT0005792	hsa-miR-320b	ENSG00000225733	FGD5-AS1	antisense	chr3	14985645	14985664	-	4	1	AGO1-4,AGO2	7mer-m8	aacgggaGAGUUGGGUCGAAAa	:|:|| |||||||	aauuggcUUUAA--CAGCUUUu	7
MIMAT0000452	hsa-miR-154-5p	ENSG00000225733	FGD5-AS1	antisense	chr3	14985665	14985687	-	4	0	AGO1-4,AGO2	7mer-m8	gcuucCGUU-GUGCCUAUUGGAu	|||| |: |||||||	uaguaGCAAGAAUUCAUAACCUu	9
MIMAT0002890	hsa-miR-299-5p	ENSG00000225733	FGD5-AS1	antisense	chr3	14985755	14985773	-	9	0	AGO1-4,AGO2	8mer	uaCAUACACCCUGCCAUUUGGu	|| |||| | |||||||	aaGUUUGUG---CAGUAAACCa	8
MIMAT0000738	hsa-miR-383-5p	ENSG00000225733	FGD5-AS1	antisense	chr3	14985790	14985811	-	8	0	AGO1-4,AGO2	7mer-m8	ucgguguuaguggaAGACUAGa	|||||||	agugagacuggagcUCUGAUCu	1
MIMAT0004987	hsa-miR-944	ENSG00000225733	FGD5-AS1	antisense	chr3	14985934	14985953	-	14	0	AGO1,AGO1-4,AGO2	7mer-m8	gagUAGGCUACAUGUUAUUAAa	|| | | | ||||||||	uaaAUACUAAG--CAAUAAUUc	7
MIMAT0000429	hsa-miR-137	ENSG00000225733	FGD5-AS1	antisense	chr3	14985937	14985959	-	14	0	AGO1,AGO1-4,AGO2	8mer	gaUGCGCAUAAGAAUUCGUUAUu	|| : | | |||||||||	agACUUUAAAUACUAAGCAAUAa	6
MIMAT0000461	hsa-miR-195-5p	ENSG00000225733	FGD5-AS1	antisense	chr3	14986024	14986043	-	18	0	AGO1-4,AGO2	7mer-m8	cgGUUAUAAAGACACGACGAu	:|||: || |||||||	uuUAAUG-UUAAAUGCUGCUu	7
MIMAT0000069	hsa-miR-16-5p	ENSG00000225733	FGD5-AS1	antisense	chr3	14986024	14986044	-	20	0	AGO1-4,AGO2	7mer-m8	gcGGUUAUAAAUGCACGACGAu	::|||: ||| |||||||	uuUUAAUG-UUAAAUGCUGCUu	8
MIMAT0000417	hsa-miR-15b-5p	ENSG00000225733	FGD5-AS1	antisense	chr3	14986024	14986044	-	20	0	AGO1-4,AGO2	7mer-m8	acAUUUGGUACUACACGACGAu	| || ::| | |||||||	uuUUAA-UGUUAAAUGCUGCUu	6
MIMAT0002820	hsa-miR-497-5p	ENSG00000225733	FGD5-AS1	antisense	chr3	14986024	14986044	-	20	0	AGO1-4,AGO2	7mer-m8	uguuuggugucacACGACGAc	|||||||	uuuuaauguuaaaUGCUGCUu	4
MIMAT0000068	hsa-miR-15a-5p	ENSG00000225733	FGD5-AS1	antisense	chr3	14986024	14986045	-	20	0	AGO1-4,AGO2	7mer-m8	guguuUGGUAAUACACGACGAu	| ::||| |||||||	uuuuuAAUGUUAAAUGCUGCUu	11
MIMAT0001341	hsa-miR-424-5p	ENSG00000225733	FGD5-AS1	antisense	chr3	14986024	14986045	-	20	0	AGO1-4,AGO2	7mer-m8	aaguuUUGUACUUAACGACGAc	||::| || |||||||	uuuuuAAUGUUAAAUGCUGCUu	9
MIMAT0027578	hsa-miR-6838-5p	ENSG00000225733	FGD5-AS1	antisense	chr3	14986024	14986046	-	21	0	AGO1-4,AGO2	7mer-m8	uccucagaACGG-UGACGACGAa	||:: | |||||||	guuuuuaaUGUUAAAUGCUGCUu	1
MIMAT0000101	hsa-miR-103a-3p	ENSG00000225733	FGD5-AS1	antisense	chr3	14986025	14986047	-	21	0	AGO1-4,AGO2	7mer-m8	aguaucgggACAUGUUACGACGa	||| ||||||||	aguuuuuaaUGUUAAAUGCUGCu	10
MIMAT0000104	hsa-miR-107	ENSG00000225733	FGD5-AS1	antisense	chr3	14986025	14986047	-	21	0	AGO1-4,AGO2	7mer-m8	acuaucgggACAUGUUACGACGa	||| ||||||||	aguuuuuaaUGUUAAAUGCUGCu	11
MIMAT0002876	hsa-miR-505-3p	ENSG00000225733	FGD5-AS1	antisense	chr3	14986164	14986184	-	2	0	AGO2	7mer-m8	ucCUUUGGUCGUUCACAACUGc	|:: |: || ||||||||	ugGGGUCUCGC-UGUGUUGACc	12
MIMAT0016844	hsa-miR-4295	ENSG00000225733	FGD5-AS1	antisense	chr3	14986228	14986245	-	2	0	AGO2	7mer-m8	uuccUUUUGUAACGUGAc	| | |||||||||	gaucACACCAUUGCACUc	0
MIMAT0000425	hsa-miR-130a-3p	ENSG00000225733	FGD5-AS1	antisense	chr3	14986228	14986249	-	2	0	AGO2	7mer-m8	uacgggaaaaUUGUAACGUGAc	| |||||||||	ccgagaucacACCAUUGCACUc	8
MIMAT0000691	hsa-miR-130b-3p	ENSG00000225733	FGD5-AS1	antisense	chr3	14986228	14986249	-	2	0	AGO2	7mer-m8	uacgggaaaGUAGUAACGUGAc	|| |||||||||	ccgagaucaCACCAUUGCACUc	11
MIMAT0003885	hsa-miR-454-3p	ENSG00000225733	FGD5-AS1	antisense	chr3	14986228	14986249	-	2	0	AGO2	7mer-m8	ugggaUAUUCGUUAUAACGUGAu	|| | || ||||||||	ccgagAUCA-CACCAUUGCACUc	9
MIMAT0018088	hsa-miR-3666	ENSG00000225733	FGD5-AS1	antisense	chr3	14986228	14986249	-	2	0	AGO2	7mer-m8	agccgUAGAUGUG--AACGUGAc	||| |||| |||||||	ccgagAUC-ACACCAUUGCACUc	0
MIMAT0000688	hsa-miR-301a-3p	ENSG00000225733	FGD5-AS1	antisense	chr3	14986228	14986250	-	2	0	AGO2	7mer-m8	cgaaaCUGUUAUGAUAACGUGAc	||: | || ||||||||	gccgaGAUCACACCAUUGCACUc	9
MIMAT0004958	hsa-miR-301b-3p	ENSG00000225733	FGD5-AS1	antisense	chr3	14986228	14986250	-	2	0	AGO2	7mer-m8	cgaaaCUGUUAUAGUAACGUGAc	||: | | |||||||||	gccgaGAUCACACCAUUGCACUc	7
MIMAT0000751	hsa-miR-330-3p	ENSG00000225733	FGD5-AS1	antisense	chr3	14986522	14986547	-	6	0	AGO1-4,AGO2	7mer-m8	agagACGU---CCGGCACACGAAACg	|||| |||| ||||||||	acaaUGCAUUUGGCCCAGUGCUUUGu	9
MIMAT0027571	hsa-miR-6835-3p	ENSG00000225733	FGD5-AS1	antisense	chr3	14986523	14986545	-	6	0	AGO1-4,AGO2	7mer-m8	gacccucugucuuuUCACGAAAa	||||||||	aaugcauuuggcccAGUGCUUUg	0
MIMAT0030428	hsa-miR-7853-5p	ENSG00000225733	FGD5-AS1	antisense	chr3	14986535	14986555	-	6	0	AGO1-4,AGO2	7mer-m8	cuucaguccuagACGUAAACu	||||||||	acauggaaacaaUGCAUUUGg	0
MIMAT0000102	hsa-miR-105-5p	ENSG00000225733	FGD5-AS1	antisense	chr3	14986535	14986558	-	6	0	AGO1-4,AGO2	7mer-m8	uggUGU-CCUCAGACUCGUAAACu	||| ||| | |||||||	caaACAUGGAAACAAUGCAUUUGg	1
MIMAT0003301	hsa-miR-33b-5p	ENSG00000225733	FGD5-AS1	antisense	chr3	14986539	14986556	-	6	0	AGO1-4,AGO2	7mer-m8	cguUACGUUGUCGUUACGUg	||| || | |||||||	aacAUGGAA-A-CAAUGCAu	13
MIMAT0000091	hsa-miR-33a-5p	ENSG00000225733	FGD5-AS1	antisense	chr3	14986539	14986557	-	6	0	AGO1-4,AGO2	7mer-m8	acguUACGUUGAUGUUACGUg	||| || ||||||||	aaacAUGGAA--ACAAUGCAu	11
MIMAT0004909	hsa-miR-450b-5p	ENSG00000225733	FGD5-AS1	antisense	chr3	14986554	14986578	-	8	0	AGO1,AGO1-4,AGO2	7mer-m8	auAAG-U-CCUUGUA-UAACGUUUu	||| | || | || |||||||	auUUCUAUGGUAAAUCCUUGCAAAc	4
MIMAT0004919	hsa-miR-541-5p	ENSG00000225733	FGD5-AS1	antisense	chr3	14986559	14986582	-	9	0	AGO1,AGO1-4,AGO2	7mer-m8	ucacccuGGCUGUCGUCUUAGGAAa	:| |::|:| |||||||	uaauauuUCUAUGGUA-AAUCCUUg	0
MIMAT0004953	hsa-miR-873-5p	ENSG00000225733	FGD5-AS1	antisense	chr3	14986662	14986683	-	4	0	AGO1-4,AGO2	7mer-m8	uccuCUGA-GUGUUCAAGGACg	||:| :| :|||||||	uguuGAUUGUAAUGGUUCCUGu	2
MIMAT0004947	hsa-miR-885-5p	ENSG00000225733	FGD5-AS1	antisense	chr3	14986668	14986689	-	4	0	AGO1-4,AGO2	7mer-m8	ucuccgucccaUCACAUUACCu	| ||||||||	aaaauguguugAUUGUAAUGGu	1
MIMAT0000242	hsa-miR-129-5p	ENSG00000225733	FGD5-AS1	antisense	chr3	14986685	14986704	-	4	0	AGO1,AGO1-4	7mer-m8	cguucGGGUCUGGCGUUUUUc	|:|| : |||||||	cauuuCUCA-UUGGCAAAAAu	3
MIMAT0000737	hsa-miR-382-5p	ENSG00000225733	FGD5-AS1	antisense	chr3	14986800	14986820	-	5	0	AGO1-4,AGO2	7mer-m8	gcuuagGUGGUGCUUGUUGAAg	||:| :| |||||||	ugcuagCAUCUUG-ACAACUUu	7
MIMAT0015018	hsa-miR-3146	ENSG00000225733	FGD5-AS1	antisense	chr3	14986811	14986830	-	5	0	AGO1-4,AGO2	7mer-m8	gguaagaAAGAUAGGAUCGUAc	||||: |||||||	cuaccacUUCUG--CUAGCAUc	0
MIMAT0000280	hsa-miR-223-3p	ENSG00000225733	FGD5-AS1	antisense	chr3	14986829	14986850	-	5	0	AGO1-4,AGO2	7mer-m8	accccauAAACUGUUUGACUGu	||| :| |||||||	ccugaccUUUCGCCAACUGACu	18
MIMAT0005795	hsa-miR-1323	ENSG00000225733	FGD5-AS1	antisense	chr3	14986868	14986889	-	3	0	AGO1-4	7mer-m8	ucuuuuaCGGGGAGUCAAAACu	||: | |||||||	gaauuggGCUACAAAGUUUUGc	1
MIMAT0005919	hsa-miR-548o-3p	ENSG00000225733	FGD5-AS1	antisense	chr3	14986868	14986892	-	3	0	AGO1-4	7mer-m8	cgUUUUCA-UUGACG--UCAAAACc	::|| | ::|| | |||||||	aaGGAAUUGGGCUACAAAGUUUUGc	2
MIMAT0000271	hsa-miR-214-3p	ENSG00000225733	FGD5-AS1	antisense	chr3	14986976	14986996	-	5	0	AGO1-4,AGO2	7mer-m8	ugacgGACAGACACGGACGACa	||| | | |||||||	gaaaaCUG-CAAUACCUGCUGc	11
MIMAT0010364	hsa-miR-761	ENSG00000225733	FGD5-AS1	antisense	chr3	14986976	14986997	-	5	0	AGO1-4,AGO2	7mer-m8	acacagucaaagugGGACGACg	|||||||	cgaaaacugcaauaCCUGCUGc	0
MIMAT0017999	hsa-miR-3619-5p	ENSG00000225733	FGD5-AS1	antisense	chr3	14986976	14987004	-	5	0	AGO1-4,AGO2	7mer-m8	cgACGUGG--UCGGAC-----GGACGACu	|||||| | ||| |||||||	gaUGCACCGAAAACUGCAAUACCUGCUGc	1
MIMAT0000735	hsa-miR-380-3p	ENSG00000225733	FGD5-AS1	antisense	chr3	14987032	14987052	-	3	0	AGO1-4,AGO2	7mer-m8	uucuaCACCUGGUAUAAUGUAu	||| | | |||||||	uccugGUGAAAC-CAUUACAUc	2
MIMAT0025857	hsa-miR-892c-5p	ENSG00000225733	FGD5-AS1	antisense	chr3	14987051	14987070	-	5	0	AGO1-4,AGO2	7mer-m8	acUGACCGUGGAAAGACUUAu	||| || :|||||||||	ccACU-ACAGUUUUCUGAAUc	2
MIMAT0018108	hsa-miR-3681-5p	ENSG00000225733	FGD5-AS1	antisense	chr3	14987065	14987088	-	5	0	AGO1-4,AGO2	8mer	cgugucucacGUAG--UAGGUGAu	|||| |||||||	gucugcugccCAUCUGAUCCACUa	3
MIMAT0027598	hsa-miR-6849-5p	ENSG00000225733	FGD5-AS1	antisense	chr3	14987065	14987088	-	5	0	AGO1-4,AGO2	8mer	agguguGUGAGGGGA-UAGGUGAg	::| | :|| |||||||	gucugcUGCCCAUCUGAUCCACUa	1
MIMAT0000738	hsa-miR-383-5p	ENSG00000225733	FGD5-AS1	antisense	chr3	14987069	14987090	-	5	0	AGO1-4,AGO2	7mer-m8	ucgguguuaguGGAAGACUAGa	|| |||||||	uggucugcugcCCAUCUGAUCc	1
MIMAT0000077	hsa-miR-22-3p	ENSG00000225733	FGD5-AS1	antisense	chr3	14987148	14987169	-	3	0	AGO1-4,AGO2	7mer-m8	ugucaagaaGUUGACCGUCGAa	||| |||||||	ugguuggacCAAGAGGCAGCUc	16
MIMAT0000427	hsa-miR-133a-3p	ENSG00000225733	FGD5-AS1	antisense	chr3	14987157	14987177	-	4	0	AGO1,AGO1-4,AGO2	7mer-m8	guCGACCAACUUCCCCUGGUUu	||| || : |||||||	caGCUCAGUG-GUUGGACCAAg	5
MIMAT0000770	hsa-miR-133b	ENSG00000225733	FGD5-AS1	antisense	chr3	14987157	14987177	-	4	0	AGO1,AGO1-4,AGO2	7mer-m8	auCGACCAACUUCCCCUGGUUu	||| || : |||||||	caGCUCAGUG-GUUGGACCAAg	2
MIMAT0015037	hsa-miR-3163	ENSG00000225733	FGD5-AS1	antisense	chr3	14987185	14987206	-	6	0	AGO1,AGO1-4,AGO2	8mer	cagaaugacgggagUAAAAUAu	|||||||	guaaugaaaagugaAUUUUAUa	1
MIMAT0002868	hsa-miR-522-3p	ENSG00000225733	FGD5-AS1	antisense	chr3	14987225	14987246	-	3	0	AGO1-4	7mer-m8	ugUGAGAUUUCCCUUGGUAAAa	|| | | | ||||||||	cuACGCAACAACAAACCAUUUc	2
MIMAT0009198	hsa-miR-224-3p	ENSG00000225733	FGD5-AS1	antisense	chr3	14987225	14987247	-	3	0	AGO1-4	7mer-m8	acAUCAGUGAUCCCGUGGUAAAa	|| || | |||||||	gcUACGCAACAACAAACCAUUUc	6
MIMAT0026640	hsa-miR-670-3p	ENSG00000225733	FGD5-AS1	antisense	chr3	14987463	14987483	-	2	1	AGO1-4	7mer-m8	aggacuuACUUAUACUCCUUu	|||| ||||||||	agagccuUGAAGAUGAGGAAc	2
MIMAT0005795	hsa-miR-1323	ENSG00000225733	FGD5-AS1	antisense	chr3	14987491	14987512	-	3	0	AGO1-4	7mer-m8	ucuuuuacggggagUCAAAACu	|||||||	gugguggcuuaagaAGUUUUGc	1
MIMAT0005919	hsa-miR-548o-3p	ENSG00000225733	FGD5-AS1	antisense	chr3	14987491	14987515	-	3	0	AGO1-4	7mer-m8	cgUUUUCAUUGA---CGUCAAAACc	|: :||::|| | |||||||	gcAGUGGUGGCUUAAGAAGUUUUGc	2
MIMAT0004956	hsa-miR-374b-3p	ENSG00000225733	FGD5-AS1	antisense	chr3	14987527	14987548	-	4	0	AGO1,AGO1-4	7mer-m8	uuacuauuaUGUUGGACGAUUc	| :| |||||||	auuuggcccAGGAACUGCUAAc	2
MIMAT0019776	hsa-miR-1343-3p	ENSG00000225733	FGD5-AS1	antisense	chr3	14987535	14987556	-	4	0	AGO1,AGO1-4	8mer	cgcucucacgccCGGGGUCCUc	| |||||||	aguaacacauuuGGCCCAGGAa	4
MIMAT0027467	hsa-miR-6783-3p	ENSG00000225733	FGD5-AS1	antisense	chr3	14987535	14987556	-	4	0	AGO1,AGO1-4	8mer	gaugucuccucuUCGGGUCCUu	:||||||||	aguaacacauuuGGCCCAGGAa	1
MIMAT0014990	hsa-miR-3127-5p	ENSG00000225733	FGD5-AS1	antisense	chr3	14988660	14988682	-	3	1	AGO1-4,AGO2	7mer-m8	gaaggguaagguGUUCGGGACUa	|::|||||||	guuggaagaagcCGGGCCCUGAc	8
MIMAT0018192	hsa-miR-3918	ENSG00000225733	FGD5-AS1	antisense	chr3	14988661	14988681	-	3	1	AGO1-4,AGO2	8mer	ucagagguagacgCCGGGACa	|||||||	uuggaagaagccgGGCCCUGa	2
MIMAT0001545	hsa-miR-450a-5p	ENSG00000225733	FGD5-AS1	antisense	chr3	14988691	14988711	-	3	0	AGO1-4,AGO2	7mer-m8	uauaauCCUUGUGUAGCGUUUu	|||| :| |||||||	gcuucuGGAAGGC-UCGCAAAg	15
MIMAT0022695	hsa-miR-212-5p	ENSG00000225733	FGD5-AS1	antisense	chr3	14988710	14988735	-	3	0	AGO1-4,AGO2	7mer-m8	ucauuCGUCAGAUC---UCGGUUCCa	|| ||| | ||||||||	acccuGCCUUCUCGCUUAGCCAAGGc	2
MIMAT0026621	hsa-miR-605-3p	ENSG00000225733	FGD5-AS1	antisense	chr3	14988724	14988746	-	1	0	AGO1-4	7mer-m8	agauuuaGA-GUAUCACGGAAGa	|| || |||||||	uggcggcCUCCACCCUGCCUUCu	1
MIMAT0010214	hsa-miR-151b	ENSG00000225733	FGD5-AS1	antisense	chr3	14988772	14988789	-	1	0	AGO1-4	7mer-m8	ucUGACACUCGAGGAGCu	|| | ||||||||||	gaACCGCGAGCUCCUCGc	3
MIMAT0004697	hsa-miR-151a-5p	ENSG00000225733	FGD5-AS1	antisense	chr3	14988772	14988792	-	1	0	AGO1-4	7mer-m8	ugaucUGACACUCGAGGAGCu	|| | ||||||||||	ggggaACCGCGAGCUCCUCGc	8
MIMAT0000085	hsa-miR-28-5p	ENSG00000225733	FGD5-AS1	antisense	chr3	14988774	14988795	-	1	0	AGO1-4	7mer-m8	gaguuaucUGACACUCGAGGAa	|| | ||||||||	ucuggggaACCGCGAGCUCCUc	5
MIMAT0015007	hsa-miR-3139	ENSG00000225733	FGD5-AS1	antisense	chr3	14988774	14988795	-	1	0	AGO1-4	7mer-m8	uuGUCCGUAGACAACUCGAGGAu	::|| | | | ||||||||	ucUGGGGAACCG-CGAGCUCCUc	1
MIMAT0004926	hsa-miR-708-5p	ENSG00000225733	FGD5-AS1	antisense	chr3	14988774	14988796	-	1	0	AGO1-4	7mer-m8	gggucgaucuaaCAUUCGAGGAa	| :|||||||	cucuggggaaccGCGAGCUCCUc	8
MIMAT0026616	hsa-miR-579-5p	ENSG00000225733	FGD5-AS1	antisense	chr3	14988781	14988800	-	1	0	AGO1-4	8mer	gcaGUAGACCGUGUUUGGCGCu	| ||||| :|||||||	gccCCUCUGG--GGAACCGCGa	4
MIMAT0016895	hsa-miR-2355-5p	ENSG00000225733	FGD5-AS1	antisense	chr3	14988787	14988807	-	1	0	AGO1-4	8mer	aacagguaacauAGACCCCUa	||||||||	caggcccgccccUCUGGGGAa	9
MIMAT0004748	hsa-miR-423-5p	ENSG00000225733	FGD5-AS1	antisense	chr3	14988793	14988815	-	2	0	AGO1-4,AGO2	7mer-m8	uuucagagcgagaGACGGGGAGu	| |||||||	cccggacgcaggcCCGCCCCUCu	9
MIMAT0015064	hsa-miR-3184-5p	ENSG00000225733	FGD5-AS1	antisense	chr3	14988793	14988820	-	2	0	AGO1-4,AGO2	7mer-m8	uuuucGAGCCAGACUC----CGGGGAGu	| ||| | || |||||||	gguuaCCCGGACGCAGGCCCGCCCCUCu	1
MIMAT0018178	hsa-miR-3180	ENSG00000225733	FGD5-AS1	antisense	chr3	14988795	14988812	-	2	0	AGO1-4,AGO2	7mer-m8	gagGCCUUCGAGGCGGGGu	|| |:|| |||||||	ggaCGCAGGC-CCGCCCCu	0
MIMAT0015080	hsa-miR-3196	ENSG00000225733	FGD5-AS1	antisense	chr3	14988795	14988814	-	2	0	AGO1-4,AGO2	7mer-m8	cuCCGGGGAC--GGCGGGGc	|| | | | |||||||	ccGGACGCAGGCCCGCCCCu	2
MIMAT0015058	hsa-miR-3180-3p	ENSG00000225733	FGD5-AS1	antisense	chr3	14988795	14988815	-	2	0	AGO1-4,AGO2	7mer-m8	ccggagGCCUUCGAGGCGGGGu	|| |:|| |||||||	cccggaCGCAGGC-CCGCCCCu	0
MIMAT0027532	hsa-miR-6816-5p	ENSG00000225733	FGD5-AS1	antisense	chr3	14988795	14988816	-	2	0	AGO1-4,AGO2	7mer-m8	cgucCCUG-GACGGGGCGGGGu	|||| | | ||||||||	acccGGACGCAGGCCCGCCCCu	0
MIMAT0004605	hsa-miR-129-2-3p	ENSG00000225733	FGD5-AS1	antisense	chr3	14988852	14988873	-	1	0	AGO1-4	7mer-m8	uaCGAAAAACCCCAUUCCCGAa	|| | || |||||||	ggGCCUAGAGGCUGAAGGGCUg	4
MIMAT0004548	hsa-miR-129-1-3p	ENSG00000225733	FGD5-AS1	antisense	chr3	14988852	14988874	-	1	0	AGO1-4	7mer-m8	uaugaaaaacCCCA-UUCCCGAa	|| | |||||||	ggggccuagaGGCUGAAGGGCUg	4
MIMAT0027393	hsa-miR-6746-3p	ENSG00000225733	FGD5-AS1	antisense	chr3	14988941	14988961	-	4	0	AGO2	8mer	gacaccUCUGUCCGCCGCCGAc	:|:| ||||||||||	ggccccGGGC-GGCGGCGGCUa	2
MIMAT0000690	hsa-miR-296-5p	ENSG00000225733	FGD5-AS1	antisense	chr3	14988956	14988978	-	4	0	AGO2	7mer-m8	uguccuaACUC--CCCCCCGGGa	||:| | |||||||	cggcccgUGGGCUGUGGGGCCCc	6
MIMAT0000439	hsa-miR-153-3p	ENSG00000225733	FGD5-AS1	antisense	chr3	14989556	14989577	-	2	1	AGO2	8mer	cuagugaaaacacUGAUACGUu	||||||||	agcggcccggcccACUAUGCAa	2
