# Supplementary material for: FGD5-AS1 is an oncogenic lncRNA in pancreatic cancer and regulates the Wnt/β-catenin signaling pathway via miR-577
Source: Oncol Rep. 2021 Nov 24;47(1):21. doi: 10.3892/or.2021.8232 (PMC8630524; doi:10.3892/or.2021.8232)
Supplement: Supporting Data [file Supplementary_Data3.xlsx]

## Sheet:  Table SII
Table SII. Target miRNAs of FGD5-AS1 predicted by LncBase Predict v.2 database.
#Transcript_ID	Gene_ID(Gene_Name)	Mirna_Name(miRBase_version)	miTG-score
>ENST00000417835	ENSG00000225733(FGD5-AS1)	hsa-miR-4258	-21	0.998
3:1529-1548	7mer	0.09
3:139-154	8mer	0.011
3:146-155	7mer	0.006
3:1592-1618	6mer	0.003
3:1561-1575	6mer	0.003
3:1503-1524	6mer	0.001
>ENST00000426200	ENSG00000225733(FGD5-AS1)	hsa-miR-6883-5p	-21	0.996
3:1821-1839	8mer	0.102
>ENST00000430166	ENSG00000225733(FGD5-AS1)	hsa-miR-6883-5p	-21	0.993
3:1131-1149	8mer	0.081
3:607-626	7mer	0.004
3:70-89	6mer	0.004
3:586-606	6mer	0.002
>ENST00000440079	ENSG00000225733(FGD5-AS1)	hsa-miR-8068	-21	0.986
3:174-201	8mer	0.036
3:993-1013	8mer	0.027
3:702-717	8mer	0.011
3:24-43	6mer	0.005
>ENST00000424349	ENSG00000225733(FGD5-AS1)	hsa-miR-4422	-21	0.985
3:3362-3383	8mer	0.021
3:91-113	7mer	0.019
3:632-656	8mer	0.014
3:239-250	7mer	0.011
3:1356-1369	6mer	0.004
3:2471-2486	7mer	0.004
3:1733-1748	7mer	0.004
3:2235-2244	6mer	0.002
3:1259-1282	6mer	0.001
>ENST00000417835	ENSG00000225733(FGD5-AS1)	hsa-miR-8068	-21	0.983
3:1337-1357	8mer	0.034
3:518-545	8mer	0.029
3:1046-1061	8mer	0.012
3:368-387	6mer	0.003
>ENST00000426200	ENSG00000225733(FGD5-AS1)	hsa-miR-153-3p	-21	0.983
3:1500-1507	9mer	0.077
>ENST00000424349	ENSG00000225733(FGD5-AS1)	hsa-miR-3613-3p	-21	0.983
3:486-506	9mer	0.024
3:206-220	8mer	0.014
3:237-252	6mer	0.009
3:3359-3385	7mer	0.006
3:177-192	6mer	0.005
3:1245-1259	8mer	0.005
3:1122-1136	7mer	0.004
3:869-873	6mer	0.003
3:2508-2521	6mer	0.002
3:2302-2320	6mer	0.002
3:1210-1233	6mer	0.001
3:1239-1259	7mer	0.001
>ENST00000417835	ENSG00000225733(FGD5-AS1)	hsa-miR-4524a-3p	-21	0.983
3:14-34	8mer	0.077
>ENST00000426200	ENSG00000225733(FGD5-AS1)	hsa-miR-8068	-21	0.974
3:505-532	8mer	0.029
3:1324-1344	8mer	0.028
3:1033-1048	8mer	0.009
3:355-374	6mer	0.003
>ENST00000430166	ENSG00000225733(FGD5-AS1)	hsa-miR-3151-5p	-21	0.971
3:30-44	9mer	0.063
3:901-922	7mer	0.005
>ENST00000417835	ENSG00000225733(FGD5-AS1)	hsa-miR-1307-3p	-21	0.963
3:1477-1495	8mer	0.06
3:60-81	6mer	0.003
>ENST00000424349	ENSG00000225733(FGD5-AS1)	hsa-miR-335-3p	-21	0.96
3:3110-3134	8mer	0.024
3:330-354	8mer	0.016
3:2907-2930	8mer	0.014
3:3031-3055	7mer	0.005
3:1343-1362	6mer	0.004
>ENST00000424349	ENSG00000225733(FGD5-AS1)	hsa-miR-493-5p	-21	0.959
3:126-140	8mer	0.039
3:35-47	7mer	0.018
3:1327-1347	7mer	0.005
>ENST00000424349	ENSG00000225733(FGD5-AS1)	hsa-miR-7157-3p	-21	0.957
3:399-424	9mer	0.056
3:944-963	6mer	0.003
3:1315-1325	6mer	0.003
>ENST00000426200	ENSG00000225733(FGD5-AS1)	hsa-miR-5193	-21	0.956
3:1706-1729	8mer	0.019
3:1697-1722	7mer	0.017
3:1712-1732	8mer	0.012
3:1709-1732	8mer	0.009
3:1523-1540	8mer+wobble	0.003
3:1715-1732	6mer	0.002
>ENST00000424349	ENSG00000225733(FGD5-AS1)	hsa-miR-548e-5p	-21	0.951
3:238-253	9mer	0.023
3:632-653	7mer	0.01
3:3362-3387	7mer	0.009
3:178-201	6mer	0.004
3:1356-1380	6mer	0.004
3:1733-1741	7mer	0.004
3:858-883	6mer	0.004
3:1091-1106	6mer	0.002
>ENST00000426200	ENSG00000225733(FGD5-AS1)	hsa-miR-335-3p	-21	0.95
3:1201-1225	8mer	0.026
3:998-1021	8mer	0.014
3:1810-1814	6mer	0.01
3:1122-1146	7mer	0.006
3:1754-1776	6mer	0.003
>ENST00000424349	ENSG00000225733(FGD5-AS1)	hsa-miR-548az-3p	-21	0.945
3:3320-3337	8mer	0.019
3:292-318	7mer	0.011
3:2769-2774	7mer	0.006
3:260-275	6mer	0.004
3:1752-1757	7mer	0.003
3:871-883	6mer	0.003
3:3204-3229	6mer	0.002
3:1696-1703	7mer	0.002
3:1241-1262	6mer	0.002
3:2581-2603	6mer	0.002
3:1619-1637	6mer	0.002
3:2206-2233	6mer	0.002
>ENST00000424349	ENSG00000225733(FGD5-AS1)	hsa-miR-548ah-3p	-21	0.943
3:292-315	7mer	0.02
3:1752-1766	7mer	0.006
3:207-231	6mer	0.005
3:487-504	6mer	0.005
3:3360-3387	6mer	0.004
3:260-275	6mer	0.004
3:1696-1703	7mer	0.002
3:1246-1267	6mer	0.002
3:2508-2531	6mer	0.002
3:2302-2328	6mer	0.002
3:1122-1140	6mer	0.002
3:1210-1234	6mer	0.001
3:2206-2231	6mer	0.001
3:1241-1265	6mer	0.001
>ENST00000424349	ENSG00000225733(FGD5-AS1)	hsa-miR-4282	-21	0.94
3:110-123	8mer	0.023
3:64-79	7mer	0.012
3:1198-1213	7mer	0.008
3:2898-2925	7mer	0.006
3:1422-1428	7mer	0.005
3:2304-2319	6mer	0.001
>ENST00000424349	ENSG00000225733(FGD5-AS1)	hsa-miR-548ae-3p	-21	0.939
3:292-316	7mer	0.018
3:1752-1757	7mer	0.006
3:207-221	6mer	0.005
3:487-504	6mer	0.005
3:3360-3386	6mer	0.004
3:260-275	6mer	0.004
3:1696-1703	7mer	0.002
3:2508-2530	6mer	0.002
3:1246-1255	6mer	0.002
3:1122-1140	6mer	0.002
3:2302-2328	6mer	0.002
3:1210-1233	6mer	0.001
3:2206-2231	6mer	0.001
3:1241-1257	6mer	0.001
>ENST00000424349	ENSG00000225733(FGD5-AS1)	hsa-miR-548aq-3p	-21	0.938
3:292-316	7mer	0.018
3:1752-1757	7mer	0.006
3:207-231	6mer	0.005
3:487-504	6mer	0.005
3:3360-3387	6mer	0.004
3:260-275	6mer	0.004
3:1696-1703	7mer	0.002
3:2508-2525	6mer	0.002
3:1246-1267	6mer	0.002
3:1122-1138	6mer	0.002
3:2302-2328	6mer	0.002
3:1210-1234	6mer	0.001
3:2206-2231	6mer	0.001
3:1241-1262	6mer	0.001
>ENST00000424349	ENSG00000225733(FGD5-AS1)	hsa-miR-548am-3p	-21	0.938
3:292-314	7mer	0.018
3:1752-1766	7mer	0.006
3:207-225	6mer	0.005
3:487-504	6mer	0.005
3:3360-3386	6mer	0.004
3:260-275	6mer	0.004
3:1696-1714	7mer	0.002
3:1246-1273	6mer	0.002
3:2508-2531	6mer	0.002
3:2302-2328	6mer	0.002
3:1122-1140	6mer	0.002
3:1210-1234	6mer	0.001
3:2206-2231	6mer	0.001
3:1241-1265	6mer	0.001
>ENST00000424349	ENSG00000225733(FGD5-AS1)	hsa-miR-4470	-21	0.938
3:383-392	8mer	0.042
3:1449-1467	8mer	0.013
>ENST00000417835	ENSG00000225733(FGD5-AS1)	hsa-miR-335-3p	-21	0.938
3:1214-1238	8mer	0.029
3:1011-1034	8mer	0.018
3:1135-1159	7mer	0.008
>ENST00000424349	ENSG00000225733(FGD5-AS1)	hsa-miR-548j-3p	-21	0.936
3:292-315	7mer	0.018
3:1752-1757	7mer	0.006
3:207-231	6mer	0.005
3:487-504	6mer	0.005
3:3360-3378	6mer	0.004
3:260-275	6mer	0.004
3:1696-1705	7mer	0.002
3:2508-2525	6mer	0.002
3:1246-1267	6mer	0.002
3:1122-1138	6mer	0.002
3:2302-2323	6mer	0.002
3:1210-1234	6mer	0.001
3:2206-2231	6mer	0.001
3:1241-1258	6mer	0.001
>ENST00000424349	ENSG00000225733(FGD5-AS1)	hsa-miR-6835-3p	-21	0.934
3:239-251	7mer	0.011
3:3362-3386	7mer	0.01
3:632-656	7mer	0.008
3:91-108	6mer	0.007
3:2235-2261	8mer	0.006
3:1356-1372	6mer	0.004
3:1733-1738	7mer	0.003
3:1064-1085	6mer	0.003
3:2471-2487	6mer	0.001
3:1259-1276	6mer	0.001
>ENST00000424349	ENSG00000225733(FGD5-AS1)	hsa-miR-5582-3p	-21	0.934
3:870-883	8mer	0.013
3:293-308	7mer	0.012
3:1753-1771	7mer	0.005
3:3203-3228	7mer	0.005
3:2580-2596	8mer	0.005
3:3320-3337	6mer	0.004
3:2769-2786	6mer	0.003
3:1167-1185	6mer	0.002
3:1619-1643	6mer	0.002
3:2350-2376	6mer	0.002
3:1697-1711	6mer	0.001
>ENST00000426200	ENSG00000225733(FGD5-AS1)	hsa-miR-1470	-21	0.93
3:1761-1777	8mer	0.031
3:1635-1653	9mer	0.02
3:1528-1545	6mer	0.001
3:1523-1545	6mer	0.001
>ENST00000424349	ENSG00000225733(FGD5-AS1)	hsa-miR-548j-5p	-21	0.928
3:254-278	8mer	0.032
3:10-30	6mer	0.008
3:179-197	6mer	0.005
3:1130-1148	6mer	0.004
3:2510-2529	6mer	0.002
3:1092-1113	6mer	0.001
>ENST00000440079	ENSG00000225733(FGD5-AS1)	hsa-miR-4716-5p	-21	0.928
3:20-27	9mer	0.052
>ENST00000424349	ENSG00000225733(FGD5-AS1)	hsa-miR-548f-3p	-21	0.921
3:2769-2776	8mer	0.011
3:292-316	7mer	0.01
3:3320-3341	7mer	0.009
3:260-275	6mer	0.004
3:1752-1762	7mer	0.003
3:871-886	6mer	0.003
3:3204-3223	6mer	0.003
3:1241-1257	6mer	0.002
3:1696-1701	7mer	0.002
3:2581-2603	6mer	0.002
3:2206-2233	6mer	0.002
>ENST00000424349	ENSG00000225733(FGD5-AS1)	hsa-miR-8068	-21	0.92
3:3233-3253	8mer	0.026
3:2414-2441	8mer	0.015
3:2942-2957	8mer	0.009
3:2264-2283	6mer	0.001
>ENST00000430166	ENSG00000225733(FGD5-AS1)	hsa-miR-6785-5p	-21	0.92
3:1131-1157	7mer	0.034
3:69-87	7mer	0.014
3:608-627	6mer	0.002
>ENST00000424349	ENSG00000225733(FGD5-AS1)	hsa-miR-548ap-5p	-21	0.919
3:254-271	8mer	0.03
3:10-27	6mer	0.008
3:179-193	6mer	0.005
3:1130-1142	6mer	0.004
3:2510-2526	6mer	0.002
3:1092-1107	6mer	0.001
>ENST00000424349	ENSG00000225733(FGD5-AS1)	hsa-miR-548ar-5p	-21	0.916
3:254-273	8mer	0.03
3:10-30	6mer	0.008
3:179-201	6mer	0.004
3:1130-1152	6mer	0.004
3:2510-2525	6mer	0.002
3:1092-1106	6mer	0.001
>ENST00000430166	ENSG00000225733(FGD5-AS1)	hsa-miR-4728-5p	-21	0.915
3:1131-1154	7mer	0.034
3:69-86	7mer	0.014
3:608-629	6mer	0.002
>ENST00000424349	ENSG00000225733(FGD5-AS1)	hsa-miR-548c-5p	-21	0.914
3:254-273	8mer	0.029
>ENST00000424349	ENSG00000225733(FGD5-AS1)	hsa-miR-548am-5p	-21	0.914
3:254-273	8mer	0.029
>ENST00000424349	ENSG00000225733(FGD5-AS1)	hsa-miR-548o-5p	-21	0.914
3:254-273	8mer	0.029
3:10-30	6mer	0.008
3:10-30	6mer	0.008
3:10-30	6mer	0.008
3:179-201	6mer	0.004
3:179-201	6mer	0.004
3:179-201	6mer	0.004
3:1130-1152	6mer	0.004
3:1130-1152	6mer	0.004
3:1130-1152	6mer	0.004
3:2510-2525	6mer	0.002
3:2510-2525	6mer	0.002
3:2510-2525	6mer	0.002
3:1092-1106	6mer	0.001
3:1092-1106	6mer	0.001
3:1092-1106	6mer	0.001
>ENST00000424349	ENSG00000225733(FGD5-AS1)	hsa-miR-561-3p	-21	0.914
3:11-34	8mer	0.029
3:121-141	7mer	0.013
3:180-189	6mer	0.005
3:2511-2535	6mer	0.002
>ENST00000424349	ENSG00000225733(FGD5-AS1)	hsa-miR-548au-5p	-21	0.912
3:254-273	8mer	0.029
3:10-30	6mer	0.008
3:179-201	6mer	0.004
3:1130-1152	6mer	0.004
3:2510-2525	6mer	0.002
3:1092-1106	6mer	0.001
>ENST00000440079	ENSG00000225733(FGD5-AS1)	hsa-miR-6773-5p	-21	0.912
3:420-446	8mer	0.049
>ENST00000424349	ENSG00000225733(FGD5-AS1)	hsa-miR-548e-3p	-21	0.912
3:292-315	7mer	0.011
3:3320-3337	7mer	0.01
3:2769-2777	7mer	0.006
3:1752-1760	7mer	0.004
3:260-275	6mer	0.004
3:871-883	6mer	0.003
3:1696-1723	7mer	0.002
3:3204-3226	6mer	0.002
3:1241-1263	6mer	0.002
3:2581-2603	6mer	0.002
3:1619-1637	6mer	0.002
3:2206-2226	6mer	0.002
>ENST00000426200	ENSG00000225733(FGD5-AS1)	hsa-miR-6773-5p	-21	0.911
3:751-777	8mer	0.04
3:1508-1519	6mer	0.009
>ENST00000440079	ENSG00000225733(FGD5-AS1)	hsa-miR-5680	-21	0.911
3:168-188	8mer	0.031
3:694-700	8mer	0.011
3:44-54	6mer	0.007
>ENST00000424349	ENSG00000225733(FGD5-AS1)	hsa-miR-6504-3p	-21	0.91
3:103-108	7mer	0.021
3:202-223	7mer	0.016
3:2912-2932	7mer	0.004
3:2381-2404	7mer	0.003
3:1439-1456	6mer	0.003
3:2162-2179	7mer	0.002
>ENST00000417835	ENSG00000225733(FGD5-AS1)	hsa-miR-602	-21	0.907
3:1601-1622	8mer	0.046
3:732-749	6mer	0.002
>ENST00000424349	ENSG00000225733(FGD5-AS1)	hsa-miR-548a-5p	-21	0.905
3:254-273	8mer	0.028
3:10-27	6mer	0.008
3:179-201	6mer	0.004
3:1130-1142	6mer	0.004
3:2510-2521	6mer	0.002
3:1092-1108	6mer	0.001
>ENST00000417835	ENSG00000225733(FGD5-AS1)	hsa-miR-2052	-21	0.905
3:1374-1391	8mer	0.024
3:1092-1114	8mer	0.02
3:601-621	6mer	0.004
>ENST00000430166	ENSG00000225733(FGD5-AS1)	hsa-miR-4729	-21	0.904
3:20-45	8mer	0.047
>ENST00000424349	ENSG00000225733(FGD5-AS1)	hsa-miR-548aj-5p	-21	0.903
3:1089-1106	9mer	0.016
>ENST00000424349	ENSG00000225733(FGD5-AS1)	hsa-miR-548g-5p	-21	0.903
3:1089-1106	9mer	0.016
>ENST00000424349	ENSG00000225733(FGD5-AS1)	hsa-miR-548x-5p	-21	0.903
3:1089-1106	9mer	0.016
3:366-381	7mer	0.012
3:366-381	7mer	0.012
3:366-381	7mer	0.012
3:3201-3226	7mer	0.009
3:3201-3226	7mer	0.009
3:3201-3226	7mer	0.009
3:2300-2322	7mer	0.006
3:2300-2322	7mer	0.006
3:2300-2322	7mer	0.006
3:2579-2594	6mer	0.003
3:2579-2594	6mer	0.003
3:2579-2594	6mer	0.003
3:2506-2529	7mer	0.002
3:2506-2529	7mer	0.002
3:2506-2529	7mer	0.002
>ENST00000440079	ENSG00000225733(FGD5-AS1)	hsa-miR-335-3p	-21	0.903
3:870-894	8mer	0.025
3:667-690	8mer	0.017
3:791-815	7mer	0.005
>ENST00000426200	ENSG00000225733(FGD5-AS1)	hsa-miR-6851-3p	-21	0.9
3:1633-1653	7mer	0.026
3:754-776	8mer	0.019
3:1252-1270	6mer	0.002
>ENST00000424349	ENSG00000225733(FGD5-AS1)	hsa-miR-548ar-3p	-21	0.899
3:3320-3337	8mer	0.018
3:2769-2778	7mer	0.006
3:293-315	6mer	0.005
3:870-883	6mer	0.003
3:1167-1190	6mer	0.002
3:3203-3225	6mer	0.002
3:1753-1765	6mer	0.002
3:2580-2601	6mer	0.002
3:2350-2364	6mer	0.002
3:1619-1644	6mer	0.002
3:1697-1722	6mer	0.001
>ENST00000424349	ENSG00000225733(FGD5-AS1)	hsa-miR-374c-3p	-21	0.897
3:296-315	8mer	0.037
3:352-373	6mer	0.005
3:1756-1775	6mer	0.002
3:1549-1565	6mer	0.001
3:1519-1538	6mer	0.001
>ENST00000426200	ENSG00000225733(FGD5-AS1)	hsa-miR-7156-5p	-21	0.895
3:1657-1683	8mer	0.046
>ENST00000440079	ENSG00000225733(FGD5-AS1)	hsa-miR-3914	-21	0.895
3:135-151	8mer	0.046
>ENST00000430166	ENSG00000225733(FGD5-AS1)	hsa-miR-939-5p	-21	0.894
3:432-454	8mer	0.038
3:1130-1151	6mer	0.005
3:485-511	6mer	0.002
>ENST00000424349	ENSG00000225733(FGD5-AS1)	hsa-miR-548f-5p	-21	0.894
3:1089-1106	9mer	0.016
3:366-376	7mer	0.011
3:3201-3225	7mer	0.009
3:2300-2318	7mer	0.005
3:2579-2601	6mer	0.003
3:2506-2531	7mer	0.002
>ENST00000424349	ENSG00000225733(FGD5-AS1)	hsa-miR-548x-3p	-21	0.893
3:292-316	7mer	0.018
>ENST00000424349	ENSG00000225733(FGD5-AS1)	hsa-miR-548aj-3p	-21	0.893
3:292-316	7mer	0.018
3:1751-1757	8mer	0.011
3:1751-1757	8mer	0.011
3:259-275	7mer	0.008
3:259-275	7mer	0.008
3:1696-1703	7mer	0.002
3:1696-1703	7mer	0.002
3:1241-1257	6mer	0.002
3:1241-1257	6mer	0.002
3:2435-2443	6mer	0.002
3:2435-2443	6mer	0.002
3:2206-2231	6mer	0.002
3:2206-2231	6mer	0.002
3:1693-1703	6mer	0.001
3:1693-1703	6mer	0.001
3:2203-2212	6mer	0.001
3:2203-2212	6mer	0.001
>ENST00000430166	ENSG00000225733(FGD5-AS1)	hsa-miR-149-3p	-21	0.893
3:1131-1156	7mer	0.035
3:607-628	7mer	0.004
3:70-83	6mer	0.004
3:586-612	6mer	0.002
>ENST00000424349	ENSG00000225733(FGD5-AS1)	hsa-miR-548h-5p	-21	0.892
3:254-272	8mer	0.026
3:10-37	6mer	0.008
3:179-200	6mer	0.004
3:1130-1153	6mer	0.004
3:2510-2523	6mer	0.002
3:1092-1106	6mer	0.001
>ENST00000424349	ENSG00000225733(FGD5-AS1)	hsa-miR-548i	-21	0.892
3:254-273	8mer	0.025
3:10-30	6mer	0.008
3:179-201	6mer	0.005
3:1130-1152	6mer	0.004
3:2510-2525	6mer	0.002
3:1092-1105	6mer	0.001
>ENST00000424349	ENSG00000225733(FGD5-AS1)	hsa-miR-548w	-21	0.892
3:254-273	8mer	0.028
3:10-36	6mer	0.008
3:179-201	6mer	0.004
3:1092-1106	6mer	0.003
3:2510-2525	6mer	0.002
>ENST00000424349	ENSG00000225733(FGD5-AS1)	hsa-miR-3163	-21	0.89
3:63-85	7mer	0.014
3:1196-1217	8mer	0.011
3:2896-2907	8mer	0.007
3:47-67	6mer	0.005
3:2958-2982	6mer	0.002
3:1165-1183	7mer	0.002
3:1692-1715	6mer	0.002
3:1624-1642	6mer	0.001
>ENST00000426200	ENSG00000225733(FGD5-AS1)	hsa-miR-6802-3p	-21	0.89
3:1756-1778	9mer	0.039
3:1125-1141	6mer	0.003
3:845-863	6mer	0.002
>ENST00000424349	ENSG00000225733(FGD5-AS1)	hsa-miR-323a-3p	-21	0.889
3:201-220	8mer	0.035
3:345-364	6mer	0.005
3:1747-1751	6mer	0.003
3:2393-2405	6mer	0.002
>ENST00000424349	ENSG00000225733(FGD5-AS1)	hsa-miR-548as-5p	-21	0.889
3:254-273	8mer	0.025
3:10-30	6mer	0.008
3:179-201	6mer	0.005
3:1130-1152	6mer	0.004
3:2510-2525	6mer	0.002
3:1092-1105	6mer	0.001
>ENST00000430166	ENSG00000225733(FGD5-AS1)	hsa-miR-5193	-21	0.887
3:1016-1039	8mer	0.016
3:1007-1032	7mer	0.011
3:1022-1042	8mer	0.007
3:1019-1042	8mer	0.006
3:833-850	8mer+wobble	0.002
3:1025-1042	6mer	0.001
>ENST00000424349	ENSG00000225733(FGD5-AS1)	hsa-miR-548d-5p	-21	0.887
3:254-273	8mer	0.024
3:10-36	6mer	0.008
3:179-201	6mer	0.005
3:1130-1152	6mer	0.004
3:2510-2525	6mer	0.002
3:1092-1106	6mer	0.001
>ENST00000424349	ENSG00000225733(FGD5-AS1)	hsa-miR-548b-5p	-21	0.887
3:254-273	8mer	0.024
3:10-36	6mer	0.008
3:179-204	6mer	0.005
3:1130-1149	6mer	0.004
3:2510-2529	6mer	0.002
3:1092-1107	6mer	0.001
>ENST00000424349	ENSG00000225733(FGD5-AS1)	hsa-miR-548y	-21	0.886
3:254-273	8mer	0.024
3:10-36	6mer	0.008
3:179-201	6mer	0.005
3:1130-1152	6mer	0.004
3:2510-2529	6mer	0.002
3:1092-1106	6mer	0.001
>ENST00000424349	ENSG00000225733(FGD5-AS1)	hsa-miR-548ay-5p	-21	0.885
3:254-273	8mer	0.024
3:10-36	6mer	0.008
3:179-201	6mer	0.005
3:1130-1152	6mer	0.004
3:2510-2525	6mer	0.002
3:1092-1106	6mer	0.001
>ENST00000424349	ENSG00000225733(FGD5-AS1)	hsa-miR-548a-3p	-21	0.885
3:3320-3337	7mer	0.009
3:2769-2774	7mer	0.006
3:870-883	7mer	0.006
3:293-315	6mer	0.005
3:3203-3229	7mer	0.004
3:2978-3000	6mer	0.003
3:2580-2606	7mer	0.003
3:1753-1760	6mer	0.002
3:1226-1245	6mer	0.002
3:1619-1637	6mer	0.002
3:1697-1703	6mer	0.001
>ENST00000424349	ENSG00000225733(FGD5-AS1)	hsa-miR-421	-21	0.883
3:644-668	8mer	0.019
3:323-346	7mer	0.008
3:342-362	6mer	0.007
3:2388-2409	7mer	0.004
3:3461-3478	8mer+mismatch	0.003
3:1877-1897	6mer	0.001
>ENST00000424349	ENSG00000225733(FGD5-AS1)	hsa-miR-548n	-21	0.882
3:254-270	8mer	0.021
3:10-31	6mer	0.01
3:178-194	7mer	0.007
3:1091-1107	7mer	0.003
3:2510-2527	6mer	0.002
>ENST00000424349	ENSG00000225733(FGD5-AS1)	hsa-miR-3691-5p	-21	0.881
3:1095-1122	8mer	0.02
3:2570-2590	8mer	0.018
3:2777-2804	7mer	0.006
>ENST00000426200	ENSG00000225733(FGD5-AS1)	hsa-miR-149-3p	-21	0.881
3:1821-1846	7mer	0.043
>ENST00000424349	ENSG00000225733(FGD5-AS1)	hsa-miR-548ak	-21	0.879
3:254-277	8mer	0.026
3:10-36	6mer	0.008
3:179-200	6mer	0.004
3:1092-1108	6mer	0.003
3:2510-2531	6mer	0.002
>ENST00000426200	ENSG00000225733(FGD5-AS1)	hsa-miR-6785-5p	-21	0.879
3:1821-1847	7mer	0.043
>ENST00000417835	ENSG00000225733(FGD5-AS1)	hsa-miR-5680	-21	0.879
3:512-532	8mer	0.024
3:1038-1044	8mer	0.015
3:388-398	6mer	0.004
>ENST00000417835	ENSG00000225733(FGD5-AS1)	hsa-miR-548az-3p	-21	0.877
3:1424-1441	8mer	0.023
3:873-878	7mer	0.009
3:310-337	6mer	0.005
3:685-707	6mer	0.003
3:1308-1333	6mer	0.003
>ENST00000430166	ENSG00000225733(FGD5-AS1)	hsa-miR-6802-3p	-21	0.876
3:1066-1088	9mer	0.032
3:179-202	7mer	0.006
3:714-733	8mer	0.005
>ENST00000430166	ENSG00000225733(FGD5-AS1)	hsa-miR-1470	-21	0.875
3:1071-1087	8mer	0.023
3:945-963	9mer	0.01
3:231-244	7mer	0.008
3:838-855	6mer	0.001
3:833-855	6mer	0.001
>ENST00000424349	ENSG00000225733(FGD5-AS1)	hsa-miR-548ad-5p	-21	0.874
3:254-272	8mer	0.021
>ENST00000424349	ENSG00000225733(FGD5-AS1)	hsa-miR-548ae-5p	-21	0.874
3:254-272	8mer	0.021
3:10-36	6mer	0.008
3:10-36	6mer	0.008
3:179-204	6mer	0.005
3:179-204	6mer	0.005
3:1130-1152	6mer	0.004
3:1130-1152	6mer	0.004
3:2510-2524	6mer	0.002
3:2510-2524	6mer	0.002
3:1092-1106	6mer	0.001
3:1092-1106	6mer	0.001
>ENST00000440079	ENSG00000225733(FGD5-AS1)	hsa-miR-6508-3p	-21	0.874
3:2-22	7mer	0.029
3:1010-1028	7mer	0.01
3:421-431	6mer	0.003
>ENST00000440079	ENSG00000225733(FGD5-AS1)	hsa-miR-3180-5p	-21	0.874
3:74-96	8mer	0.03
3:1217-1238	8mer	0.009
3:1191-1216	6mer	0.003
>ENST00000424349	ENSG00000225733(FGD5-AS1)	hsa-miR-524-5p	-21	0.874
3:119-140	7mer	0.018
3:307-332	6mer	0.006
3:38-53	6mer	0.005
3:205-219	6mer	0.005
3:485-506	6mer	0.003
3:1441-1455	6mer	0.003
>ENST00000424349	ENSG00000225733(FGD5-AS1)	hsa-miR-548bb-5p	-21	0.873
3:254-273	8mer	0.024
3:10-36	6mer	0.008
3:179-201	6mer	0.005
3:1092-1106	6mer	0.003
3:2510-2525	6mer	0.002
>ENST00000424349	ENSG00000225733(FGD5-AS1)	hsa-miR-520d-5p	-21	0.873
3:119-140	7mer	0.018
3:307-332	6mer	0.007
3:38-52	6mer	0.005
3:205-220	6mer	0.005
3:485-505	6mer	0.003
3:1441-1455	6mer	0.003
>ENST00000426200	ENSG00000225733(FGD5-AS1)	hsa-miR-4728-5p	-21	0.872
3:1821-1844	7mer	0.042
>ENST00000424349	ENSG00000225733(FGD5-AS1)	hsa-miR-944	-21	0.87
3:66-85	8mer	0.028
3:1646-1653	8mer	0.006
3:595-615	6mer	0.003
3:939-960	6mer	0.003
3:2305-2326	6mer	0.002
>ENST00000426200	ENSG00000225733(FGD5-AS1)	hsa-miR-6724-5p	-21	0.87
3:752-777	7mer	0.017
3:332-355	7mer	0.011
3:1340-1359	7mer	0.01
3:1682-1690	6mer	0.003
>ENST00000424349	ENSG00000225733(FGD5-AS1)	hsa-miR-1323	-21	0.869
3:2977-2998	7mer	0.01
3:3203-3223	7mer	0.009
3:870-883	7mer	0.007
3:2580-2601	7mer	0.005
3:2368-2379	7mer	0.005
3:1225-1239	7mer	0.003
3:857-875	6mer	0.002
3:1121-1139	6mer	0.001
>ENST00000417835	ENSG00000225733(FGD5-AS1)	hsa-miR-1323	-21	0.869
3:1081-1102	7mer	0.012
3:1307-1327	7mer	0.012
3:472-483	7mer	0.01
3:684-705	7mer	0.008
>ENST00000417835	ENSG00000225733(FGD5-AS1)	hsa-miR-548ar-3p	-21	0.868
3:1424-1441	8mer	0.022
3:873-882	7mer	0.009
3:454-468	6mer	0.004
3:684-705	6mer	0.003
3:1307-1329	6mer	0.003
>ENST00000426200	ENSG00000225733(FGD5-AS1)	hsa-miR-328-3p	-21	0.868
3:1633-1651	8mer	0.039
3:1252-1276	6mer	0.002
>ENST00000424349	ENSG00000225733(FGD5-AS1)	hsa-miR-6737-3p	-21	0.866
3:399-423	8mer	0.035
3:944-948	6mer	0.003
3:1315-1319	6mer	0.003
>ENST00000440079	ENSG00000225733(FGD5-AS1)	hsa-miR-1323	-21	0.865
3:128-139	7mer	0.013
3:737-758	7mer	0.01
3:963-983	7mer	0.009
3:340-361	7mer	0.009
>ENST00000424349	ENSG00000225733(FGD5-AS1)	hsa-miR-548ab	-21	0.865
3:254-274	8mer	0.021
3:10-36	6mer	0.008
3:179-201	6mer	0.005
3:1130-1152	6mer	0.004
3:2510-2526	6mer	0.002
3:1092-1106	6mer	0.001
>ENST00000417835	ENSG00000225733(FGD5-AS1)	hsa-miR-6752-3p	-21	0.864
3:1568-1593	8mer	0.027
3:606-611	7mer	0.014
>ENST00000440079	ENSG00000225733(FGD5-AS1)	hsa-miR-2052	-21	0.862
3:1030-1047	8mer	0.019
3:748-770	8mer	0.016
3:257-277	6mer	0.005
>ENST00000426200	ENSG00000225733(FGD5-AS1)	hsa-miR-5680	-21	0.861
3:499-519	8mer	0.024
3:1025-1031	8mer	0.012
3:375-385	6mer	0.004
>ENST00000440079	ENSG00000225733(FGD5-AS1)	hsa-miR-4640-5p	-21	0.861
3:2-17	7mer	0.027
3:1010-1030	7mer	0.011
3:421-446	6mer	0.003
>ENST00000424349	ENSG00000225733(FGD5-AS1)	hsa-miR-2052	-21	0.86
3:3270-3287	8mer	0.017
3:2988-3010	8mer	0.015
3:1341-1363	6mer	0.002
3:1152-1156	6mer	0.002
3:2497-2517	6mer	0.002
3:1684-1694	6mer	0.002
>ENST00000426200	ENSG00000225733(FGD5-AS1)	hsa-miR-4716-5p	-21	0.858
3:351-358	9mer	0.03
3:180-199	7mer	0.01
>ENST00000417835	ENSG00000225733(FGD5-AS1)	hsa-miR-4716-5p	-21	0.855
3:364-371	9mer	0.029
3:193-212	7mer	0.01
>ENST00000417835	ENSG00000225733(FGD5-AS1)	hsa-miR-6724-5p	-21	0.855
3:765-790	7mer	0.017
3:1353-1372	7mer	0.012
3:345-368	7mer	0.011
>ENST00000424349	ENSG00000225733(FGD5-AS1)	hsa-miR-548k	-21	0.853
3:254-274	7mer	0.012
3:1130-1152	7mer	0.011
3:10-30	6mer	0.008
3:179-201	6mer	0.005
3:2510-2526	6mer	0.002
3:1092-1106	6mer	0.001
>ENST00000440079	ENSG00000225733(FGD5-AS1)	hsa-miR-548ar-3p	-21	0.853
3:1080-1097	8mer	0.019
3:529-538	7mer	0.009
3:110-124	6mer	0.005
3:340-361	6mer	0.004
3:963-985	6mer	0.002
>ENST00000426200	ENSG00000225733(FGD5-AS1)	hsa-miR-2052	-21	0.852
3:1361-1378	8mer	0.019
3:1079-1101	8mer	0.016
3:588-608	6mer	0.004
>ENST00000424349	ENSG00000225733(FGD5-AS1)	hsa-miR-1278	-21	0.852
3:84-103	7mer	0.027
3:73-96	6mer	0.005
3:135-157	6mer	0.005
3:1670-1681	6mer	0.002
>ENST00000417835	ENSG00000225733(FGD5-AS1)	hsa-miR-6773-5p	-21	0.852
3:764-790	8mer	0.039
>ENST00000424349	ENSG00000225733(FGD5-AS1)	hsa-miR-548ac	-21	0.85
3:292-316	6mer	0.006
3:207-228	6mer	0.005
3:487-508	6mer	0.005
3:3360-3386	6mer	0.004
3:260-275	6mer	0.004
3:1752-1756	6mer	0.003
3:2508-2520	6mer	0.002
3:1246-1255	6mer	0.002
3:1122-1138	6mer	0.002
3:2302-2318	6mer	0.002
3:1210-1233	6mer	0.001
3:1696-1703	6mer	0.001
3:2206-2232	6mer	0.001
3:1241-1255	6mer	0.001
>ENST00000424349	ENSG00000225733(FGD5-AS1)	hsa-miR-548h-3p	-21	0.849
3:292-315	6mer	0.006
>ENST00000424349	ENSG00000225733(FGD5-AS1)	hsa-miR-548z	-21	0.849
3:292-315	6mer	0.006
3:207-231	6mer	0.005
3:207-231	6mer	0.005
3:487-504	6mer	0.005
3:487-504	6mer	0.005
3:3360-3387	6mer	0.004
3:3360-3387	6mer	0.004
3:260-275	6mer	0.004
3:260-275	6mer	0.004
3:1752-1756	6mer	0.003
3:1752-1756	6mer	0.003
3:1246-1267	6mer	0.002
3:1246-1267	6mer	0.002
3:2508-2530	6mer	0.002
3:2508-2530	6mer	0.002
3:1122-1138	6mer	0.002
3:1122-1138	6mer	0.002
3:2302-2323	6mer	0.002
3:2302-2323	6mer	0.002
3:1210-1222	6mer	0.001
3:1210-1222	6mer	0.001
3:1696-1703	6mer	0.001
3:1696-1703	6mer	0.001
3:2206-2232	6mer	0.001
3:2206-2232	6mer	0.001
3:1241-1263	6mer	0.001
3:1241-1263	6mer	0.001
>ENST00000424349	ENSG00000225733(FGD5-AS1)	hsa-miR-1179	-21	0.849
3:634-651	8mer	0.022
3:92-118	6mer	0.008
3:3364-3388	6mer	0.004
3:2472-2493	7mer	0.003
3:1739-1760	6mer	0.002
>ENST00000417835	ENSG00000225733(FGD5-AS1)	hsa-miR-548f-3p	-21	0.846
3:873-880	8mer	0.015
3:1424-1445	7mer	0.011
3:310-337	6mer	0.005
3:1308-1327	6mer	0.004
3:685-707	6mer	0.003
>ENST00000424349	ENSG00000225733(FGD5-AS1)	hsa-miR-548aw	-21	0.843
3:365-385	7mer	0.01
3:1088-1103	8mer	0.007
3:3201-3227	7mer	0.006
3:2506-2526	7mer	0.004
3:1279-1299	7mer	0.004
3:2299-2318	7mer	0.004
3:2830-2842	6mer	0.003
3:1941-1961	6mer	0.001
>ENST00000424349	ENSG00000225733(FGD5-AS1)	hsa-miR-4775	-21	0.843
3:3107-3126	8mer	0.015
3:194-220	7mer	0.011
3:285-306	6mer	0.008
3:2052-2072	8mer	0.004
>ENST00000424349	ENSG00000225733(FGD5-AS1)	hsa-miR-548av-5p	-21	0.842
3:1130-1151	7mer	0.011
3:254-270	7mer	0.011
3:10-25	6mer	0.008
3:179-192	6mer	0.005
3:2510-2532	6mer	0.002
3:1092-1100	6mer	0.001
>ENST00000426200	ENSG00000225733(FGD5-AS1)	hsa-miR-4485-5p	-21	0.842
3:1802-1807	6mer	0.013
3:1720-1729	8mer	0.009
3:1621-1641	6mer	0.008
3:1534-1550	8mer+wobble	0.003
3:1776-1801	6mer	0.003
3:135-146	6mer	0.002
>ENST00000424349	ENSG00000225733(FGD5-AS1)	hsa-miR-577	-21	0.84
3:60-80	8mer	0.038
>ENST00000426200	ENSG00000225733(FGD5-AS1)	hsa-miR-4258	-21	0.839
3:1619-1643	7mer	0.014
3:126-141	8mer	0.011
3:133-142	7mer	0.006
3:1532-1547	7mer	0.005
3:1719-1741	6mer	0.002
>ENST00000440079	ENSG00000225733(FGD5-AS1)	hsa-miR-548g-5p	-21	0.838
3:60-82	7mer	0.017
>ENST00000440079	ENSG00000225733(FGD5-AS1)	hsa-miR-548aj-5p	-21	0.838
3:60-82	7mer	0.017
>ENST00000440079	ENSG00000225733(FGD5-AS1)	hsa-miR-548x-5p	-21	0.838
3:60-82	7mer	0.017
3:961-986	7mer	0.009
3:961-986	7mer	0.009
3:961-986	7mer	0.009
3:266-289	7mer	0.006
3:266-289	7mer	0.006
3:266-289	7mer	0.006
3:339-354	6mer	0.005
3:339-354	6mer	0.005
3:339-354	6mer	0.005
>ENST00000426200	ENSG00000225733(FGD5-AS1)	hsa-miR-1323	-21	0.838
3:1068-1089	7mer	0.01
3:459-470	7mer	0.01
3:1294-1314	7mer	0.009
3:671-692	7mer	0.008
>ENST00000424349	ENSG00000225733(FGD5-AS1)	hsa-miR-6841-3p	-21	0.837
3:375-390	9mer	0.021
3:3198-3221	7mer	0.016
>ENST00000417835	ENSG00000225733(FGD5-AS1)	hsa-miR-548x-5p	-21	0.837
3:404-426	7mer	0.015
>ENST00000417835	ENSG00000225733(FGD5-AS1)	hsa-miR-548g-5p	-21	0.837
3:404-426	7mer	0.015
>ENST00000417835	ENSG00000225733(FGD5-AS1)	hsa-miR-548aj-5p	-21	0.837
3:404-426	7mer	0.015
3:1305-1330	7mer	0.011
3:1305-1330	7mer	0.011
3:1305-1330	7mer	0.011
3:610-633	7mer	0.006
3:610-633	7mer	0.006
3:610-633	7mer	0.006
3:683-698	6mer	0.004
3:683-698	6mer	0.004
3:683-698	6mer	0.004
>ENST00000424349	ENSG00000225733(FGD5-AS1)	hsa-miR-320a	-21	0.836
3:1356-1378	8mer	0.014
3:239-266	6mer	0.008
3:632-653	6mer	0.006
3:3362-3380	6mer	0.004
3:985-1010	6mer	0.003
3:1733-1748	6mer	0.002
>ENST00000424349	ENSG00000225733(FGD5-AS1)	hsa-miR-320b	-21	0.836
3:1356-1378	8mer	0.014
3:239-266	6mer	0.008
3:632-653	6mer	0.006
3:3362-3380	6mer	0.004
3:985-1010	6mer	0.003
3:1733-1748	6mer	0.002
>ENST00000426200	ENSG00000225733(FGD5-AS1)	hsa-miR-5096	-21	0.835
3:1124-1136	7mer	0.016
3:1755-1779	7mer	0.009
3:843-859	9mer	0.009
3:174-193	8mer+mismatch	0.003
>ENST00000424349	ENSG00000225733(FGD5-AS1)	hsa-miR-320c	-21	0.833
3:1356-1379	8mer	0.015
3:239-257	6mer	0.008
3:632-651	6mer	0.005
3:3362-3375	6mer	0.004
3:985-1010	6mer	0.003
3:1733-1749	6mer	0.002
>ENST00000424349	ENSG00000225733(FGD5-AS1)	hsa-miR-320d	-21	0.833
3:1356-1378	8mer	0.015
3:239-257	6mer	0.008
3:632-650	6mer	0.005
3:3362-3375	6mer	0.004
3:985-1002	6mer	0.003
3:1733-1748	6mer	0.002
>ENST00000440079	ENSG00000225733(FGD5-AS1)	hsa-miR-3691-5p	-21	0.832
3:330-350	8mer	0.029
3:537-564	7mer	0.008
>ENST00000424349	ENSG00000225733(FGD5-AS1)	hsa-miR-1468-3p	-21	0.831
3:367-384	8mer	0.023
3:3202-3226	6mer	0.004
3:1090-1099	6mer	0.004
3:2579-2597	6mer	0.003
3:2301-2326	6mer	0.002
3:2507-2524	6mer	0.001
>ENST00000417835	ENSG00000225733(FGD5-AS1)	hsa-miR-3691-5p	-21	0.831
3:674-694	8mer	0.028
3:881-908	7mer	0.009
>ENST00000424349	ENSG00000225733(FGD5-AS1)	hsa-miR-548an	-21	0.829
3:144-160	7mer	0.015
3:210-232	6mer	0.007
3:1249-1266	8mer	0.005
3:859-882	6mer	0.004
3:1054-1074	6mer	0.003
3:1283-1306	6mer	0.002
>ENST00000424349	ENSG00000225733(FGD5-AS1)	hsa-miR-4429	-21	0.829
3:1356-1371	8mer	0.015
3:239-257	6mer	0.008
3:632-637	6mer	0.005
3:3362-3367	6mer	0.004
3:985-1005	6mer	0.003
3:1733-1756	6mer	0.002
>ENST00000430166	ENSG00000225733(FGD5-AS1)	hsa-miR-6501-3p	-21	0.828
3:753-771	8mer	0.024
3:244-268	8mer	0.008
3:680-701	6mer	0.004
>ENST00000426200	ENSG00000225733(FGD5-AS1)	hsa-miR-3914	-21	0.828
3:466-482	8mer	0.036
>ENST00000430166	ENSG00000225733(FGD5-AS1)	hsa-miR-153-3p	-21	0.827
3:810-817	9mer	0.036
>ENST00000424349	ENSG00000225733(FGD5-AS1)	hsa-miR-512-3p	-21	0.826
3:686-704	8mer	0.021
3:961-979	8mer	0.015
>ENST00000424349	ENSG00000225733(FGD5-AS1)	hsa-miR-6724-5p	-21	0.824
3:2661-2686	7mer	0.012
3:3249-3268	7mer	0.009
3:1525-1547	7mer	0.006
3:2241-2264	7mer	0.004
3:552-571	6mer	0.004
>ENST00000424349	ENSG00000225733(FGD5-AS1)	hsa-miR-548av-3p	-21	0.824
3:3320-3337	8mer	0.014
3:293-315	6mer	0.005
3:2769-2778	7mer	0.004
3:871-887	6mer	0.003
3:3204-3225	6mer	0.003
3:1619-1637	6mer	0.002
3:2581-2606	6mer	0.002
3:1753-1766	6mer	0.002
3:1453-1472	6mer	0.001
>ENST00000417835	ENSG00000225733(FGD5-AS1)	hsa-miR-3914	-21	0.823
3:479-495	8mer	0.036
>ENST00000426200	ENSG00000225733(FGD5-AS1)	hsa-miR-4715-5p	-21	0.822
3:1630-1650	7mer	0.025
3:635-654	7mer	0.008
3:603-628	6mer	0.003
>ENST00000430166	ENSG00000225733(FGD5-AS1)	hsa-miR-6799-5p	-21	0.821
3:1130-1148	7mer	0.026
3:70-84	6mer	0.005
3:433-459	8mer+mismatch	0.003
3:607-626	6mer	0.002
>ENST00000440079	ENSG00000225733(FGD5-AS1)	hsa-miR-3182	-21	0.819
3:861-881	8mer	0.03
3:1187-1202	6mer	0.006
>ENST00000424349	ENSG00000225733(FGD5-AS1)	hsa-miR-670-3p	-21	0.819
3:1103-1125	8mer	0.019
3:3175-3189	8mer	0.013
3:425-445	6mer	0.003
>ENST00000424349	ENSG00000225733(FGD5-AS1)	hsa-miR-3182	-21	0.819
3:3101-3121	8mer	0.03
3:3450-3465	6mer	0.005
>ENST00000417835	ENSG00000225733(FGD5-AS1)	hsa-miR-548f-5p	-21	0.818
3:404-422	7mer	0.014
3:1305-1329	7mer	0.011
3:610-635	7mer	0.006
3:683-705	6mer	0.004
>ENST00000440079	ENSG00000225733(FGD5-AS1)	hsa-miR-548f-5p	-21	0.818
3:60-78	7mer	0.015
3:961-985	7mer	0.009
3:266-291	7mer	0.006
3:339-361	6mer	0.005
>ENST00000426200	ENSG00000225733(FGD5-AS1)	hsa-miR-7853-5p	-21	0.818
3:337-355	8mer	0.019
3:78-92	7mer	0.013
3:1345-1359	6mer	0.003
>ENST00000426200	ENSG00000225733(FGD5-AS1)	hsa-miR-4731-5p	-21	0.818
3:246-266	7mer	0.032
3:1681-1693	6mer	0.003
>ENST00000424349	ENSG00000225733(FGD5-AS1)	hsa-miR-129-5p	-21	0.817
3:878-896	7mer	0.011
3:2824-2843	6mer	0.004
3:2397-2414	7mer	0.003
3:3338-3348	6mer	0.003
3:3030-3052	6mer	0.003
3:1155-1173	6mer	0.003
3:2058-2081	6mer	0.003
3:1906-1929	6mer	0.002
3:875-896	6mer	0.002
3:2820-2843	6mer	0.001
3:1897-1923	6mer	0.001
>ENST00000417835	ENSG00000225733(FGD5-AS1)	hsa-miR-548a-3p	-21	0.815
3:1424-1441	7mer	0.011
3:873-878	7mer	0.009
3:1307-1333	7mer	0.006
3:684-710	7mer	0.005
3:1082-1104	6mer	0.004
>ENST00000417835	ENSG00000225733(FGD5-AS1)	hsa-miR-6891-3p	-21	0.814
3:1281-1302	8mer	0.031
3:113-117	6mer	0.003
>ENST00000440079	ENSG00000225733(FGD5-AS1)	hsa-miR-548az-3p	-21	0.814
3:1080-1097	8mer	0.02
3:529-534	7mer	0.009
3:341-363	6mer	0.004
3:964-989	6mer	0.002
>ENST00000424349	ENSG00000225733(FGD5-AS1)	hsa-miR-7160-5p	-21	0.814
3:2725-2747	7mer	0.015
3:744-771	7mer	0.007
3:3408-3435	7mer	0.004
3:3092-3107	6mer	0.004
3:964-982	6mer	0.002
3:1297-1319	6mer	0.002
3:689-706	6mer	0.001
3:3058-3080	6mer	0.001
>ENST00000417835	ENSG00000225733(FGD5-AS1)	hsa-miR-4290	-21	0.813
3:1571-1595	8mer	0.035
>ENST00000440079	ENSG00000225733(FGD5-AS1)	hsa-miR-4307	-21	0.812
3:172-189	7mer	0.015
3:1029-1052	7mer	0.009
3:23-40	6mer	0.007
3:992-1014	6mer	0.004
>ENST00000426200	ENSG00000225733(FGD5-AS1)	hsa-miR-3691-5p	-21	0.811
3:661-681	8mer	0.028
3:868-895	7mer	0.007
>ENST00000440079	ENSG00000225733(FGD5-AS1)	hsa-miR-33a-5p	-21	0.811
3:10-30	8mer	0.03
3:469-492	6mer	0.004
>ENST00000424349	ENSG00000225733(FGD5-AS1)	hsa-miR-548at-5p	-21	0.81
3:10-30	7mer	0.015
3:179-194	7mer	0.007
3:122-141	6mer	0.006
3:2510-2529	7mer	0.004
3:1092-1105	6mer	0.003
>ENST00000417835	ENSG00000225733(FGD5-AS1)	hsa-miR-129-5p	-21	0.81
3:10-33	6mer	0.008
3:501-518	7mer	0.007
3:928-947	6mer	0.005
3:162-185	6mer	0.005
3:1134-1156	6mer	0.004
3:1442-1452	6mer	0.004
3:924-947	6mer	0.001
>ENST00000417835	ENSG00000225733(FGD5-AS1)	hsa-miR-3182	-21	0.809
3:1205-1225	8mer	0.034
>ENST00000426200	ENSG00000225733(FGD5-AS1)	hsa-miR-6084	-21	0.809
3:1638-1653	8mer	0.031
3:1775-1790	6mer	0.004
>ENST00000417835	ENSG00000225733(FGD5-AS1)	hsa-miR-4731-5p	-21	0.807
3:259-279	7mer	0.032
3:1580-1598	8mer+wobble	0.002
>ENST00000417835	ENSG00000225733(FGD5-AS1)	hsa-miR-7853-5p	-21	0.807
3:350-368	8mer	0.018
3:91-105	7mer	0.013
3:1358-1372	6mer	0.003
>ENST00000424349	ENSG00000225733(FGD5-AS1)	hsa-miR-3606-3p	-21	0.807
3:110-124	7mer	0.012
3:65-85	6mer	0.007
3:2310-2321	7mer	0.005
3:1422-1438	7mer	0.004
3:3331-3340	6mer	0.004
3:2899-2916	6mer	0.003
3:2304-2324	6mer	0.001
>ENST00000417835	ENSG00000225733(FGD5-AS1)	hsa-miR-548aw	-21	0.806
3:403-422	7mer	0.011
3:1305-1331	7mer	0.008
3:610-630	7mer	0.008
3:934-946	6mer	0.004
3:45-65	6mer	0.004
>ENST00000424349	ENSG00000225733(FGD5-AS1)	hsa-miR-580-5p	-21	0.806
3:452-473	7mer	0.009
3:42-63	6mer	0.007
3:3124-3138	7mer	0.007
3:406-429	6mer	0.003
3:1990-2012	8mer	0.003
3:821-828	6mer	0.003
3:3071-3090	6mer	0.002
>ENST00000440079	ENSG00000225733(FGD5-AS1)	hsa-miR-6755-3p	-21	0.806
3:274-288	7mer	0.014
3:905-918	7mer	0.007
3:402-427	7mer	0.006
3:1038-1060	6mer	0.004
3:705-714	6mer	0.003
>ENST00000424349	ENSG00000225733(FGD5-AS1)	hsa-miR-559	-21	0.806
3:255-272	8mer	0.023
3:1129-1138	7mer	0.009
3:1663-1681	6mer	0.002
>ENST00000424349	ENSG00000225733(FGD5-AS1)	hsa-miR-7159-5p	-21	0.806
3:341-366	7mer	0.013
3:643-653	7mer	0.012
3:324-347	6mer	0.003
3:2389-2408	6mer	0.002
3:2602-2620	6mer	0.002
3:1877-1889	6mer	0.001
>ENST00000426200	ENSG00000225733(FGD5-AS1)	hsa-miR-548az-3p	-21	0.805
3:1411-1428	8mer	0.017
3:860-865	7mer	0.007
3:297-324	6mer	0.004
3:672-694	6mer	0.004
3:1295-1320	6mer	0.002
>ENST00000424349	ENSG00000225733(FGD5-AS1)	hsa-miR-4663	-21	0.804
3:2726-2742	7mer	0.016
3:745-763	8mer	0.009
3:3409-3435	7mer	0.005
3:3093-3117	6mer	0.004
>ENST00000417835	ENSG00000225733(FGD5-AS1)	hsa-miR-6072	-21	0.802
3:1280-1304	8mer	0.03
3:113-134	6mer	0.003
>ENST00000426200	ENSG00000225733(FGD5-AS1)	hsa-miR-548ar-3p	-21	0.802
3:1411-1428	8mer	0.016
3:860-869	7mer	0.007
3:441-455	6mer	0.004
3:671-692	6mer	0.003
3:1294-1316	6mer	0.002
>ENST00000424349	ENSG00000225733(FGD5-AS1)	hsa-miR-4326	-21	0.802
3:1101-1117	8mer	0.019
3:3173-3190	7mer	0.007
3:424-442	7mer	0.006
3:3245-3257	6mer	0.002
>ENST00000426200	ENSG00000225733(FGD5-AS1)	hsa-miR-6885-3p	-21	0.802
3:1138-1163	8mer	0.01
3:1464-1469	6mer	0.008
3:1425-1430	7mer	0.007
3:1498-1525	6mer	0.005
3:814-833	6mer	0.004
>ENST00000430166	ENSG00000225733(FGD5-AS1)	hsa-miR-3192-5p	-21	0.801
3:67-88	9mer	0.03
3:281-295	7mer	0.004
>ENST00000430166	ENSG00000225733(FGD5-AS1)	hsa-miR-6795-3p	-21	0.799
3:764-780	8mer	0.026
3:1069-1089	7mer	0.004
3:837-849	6mer	0.002
3:832-849	6mer	0.001
>ENST00000424349	ENSG00000225733(FGD5-AS1)	hsa-miR-4711-5p	-21	0.799
3:931-956	8mer	0.029
3:1335-1359	6mer	0.002
3:2710-2730	6mer	0.002
>ENST00000424349	ENSG00000225733(FGD5-AS1)	hsa-miR-1252-3p	-21	0.797
3:40-52	7mer	0.014
3:1612-1630	7mer	0.007
3:3255-3259	6mer	0.004
3:1988-2000	7mer	0.003
3:1443-1465	6mer	0.002
3:2247-2261	6mer	0.002
3:1603-1608	6mer	0.001
>ENST00000417835	ENSG00000225733(FGD5-AS1)	hsa-miR-4307	-21	0.796
3:516-533	7mer	0.011
3:1373-1396	7mer	0.011
3:1336-1358	6mer	0.006
3:367-384	6mer	0.005
>ENST00000424349	ENSG00000225733(FGD5-AS1)	hsa-miR-6072	-21	0.794
3:3176-3200	8mer	0.024
3:1104-1123	7mer	0.007
3:2009-2030	6mer	0.001
>ENST00000417835	ENSG00000225733(FGD5-AS1)	hsa-miR-5096	-21	0.792
3:1137-1149	7mer	0.019
3:856-872	9mer	0.01
3:187-206	8mer+mismatch	0.003
>ENST00000430166	ENSG00000225733(FGD5-AS1)	hsa-miR-6815-3p	-21	0.792
3:664-681	8mer	0.017
3:539-555	9mer	0.008
3:518-537	9mer	0.004
3:42-61	6mer	0.003
>ENST00000426200	ENSG00000225733(FGD5-AS1)	hsa-miR-548aj-5p	-21	0.789
3:391-413	7mer	0.013
>ENST00000426200	ENSG00000225733(FGD5-AS1)	hsa-miR-548x-5p	-21	0.789
3:391-413	7mer	0.013
>ENST00000426200	ENSG00000225733(FGD5-AS1)	hsa-miR-548g-5p	-21	0.789
3:391-413	7mer	0.013
3:1292-1317	7mer	0.01
3:1292-1317	7mer	0.01
3:1292-1317	7mer	0.01
3:597-620	7mer	0.005
3:597-620	7mer	0.005
3:597-620	7mer	0.005
3:670-685	6mer	0.005
3:670-685	6mer	0.005
3:670-685	6mer	0.005
>ENST00000440079	ENSG00000225733(FGD5-AS1)	hsa-miR-548a-3p	-21	0.788
3:1080-1097	7mer	0.01
3:529-534	7mer	0.009
3:340-366	7mer	0.006
3:963-989	7mer	0.004
3:738-760	6mer	0.003
>ENST00000440079	ENSG00000225733(FGD5-AS1)	hsa-miR-4663	-21	0.788
3:486-502	7mer	0.022
3:1146-1172	7mer	0.005
3:853-877	6mer	0.004
>ENST00000430166	ENSG00000225733(FGD5-AS1)	hsa-miR-4800-3p	-21	0.787
3:743-754	8mer	0.032
>ENST00000424349	ENSG00000225733(FGD5-AS1)	hsa-miR-548o-3p	-21	0.787
3:3203-3225	7mer	0.01
3:870-887	7mer	0.008
3:2580-2603	7mer	0.005
3:2978-3000	6mer	0.004
3:2369-2390	6mer	0.002
3:1238-1262	6mer	0.002
3:1209-1234	6mer	0.001
3:1226-1239	6mer	0.001
>ENST00000440079	ENSG00000225733(FGD5-AS1)	hsa-miR-548f-3p	-21	0.786
3:529-536	8mer	0.016
3:1080-1101	7mer	0.01
3:341-363	6mer	0.004
3:964-983	6mer	0.003
>ENST00000417835	ENSG00000225733(FGD5-AS1)	hsa-miR-548e-3p	-21	0.786
3:1424-1441	7mer	0.012
3:873-881	7mer	0.009
3:310-330	6mer	0.005
3:685-707	6mer	0.003
3:1308-1330	6mer	0.003
>ENST00000424349	ENSG00000225733(FGD5-AS1)	hsa-miR-4307	-21	0.784
3:3269-3292	7mer	0.008
3:1682-1705	9mer	0.006
3:2412-2429	7mer	0.006
3:391-402	6mer	0.004
3:3232-3254	6mer	0.004
3:895-900	6mer	0.003
3:2263-2280	6mer	0.001
>ENST00000424349	ENSG00000225733(FGD5-AS1)	hsa-miR-6885-3p	-21	0.784
3:880-887	7mer	0.01
3:3047-3072	8mer	0.009
3:3334-3339	7mer	0.007
3:2723-2742	6mer	0.003
3:3470-3491	6mer	0.003
>ENST00000424349	ENSG00000225733(FGD5-AS1)	hsa-miR-548az-5p	-21	0.784
3:10-35	6mer	0.01
3:238-252	6mer	0.009
3:178-201	7mer	0.007
3:1091-1106	8mer	0.006
>ENST00000424349	ENSG00000225733(FGD5-AS1)	hsa-miR-5003-3p	-21	0.784
3:2905-2921	7mer	0.014
3:328-341	7mer	0.01
3:874-890	6mer	0.003
3:2606-2628	6mer	0.002
3:1397-1418	6mer	0.002
3:1896-1913	6mer	0.001
>ENST00000424349	ENSG00000225733(FGD5-AS1)	hsa-miR-3977	-21	0.783
3:1581-1587	8mer	0.013
3:994-1015	7mer	0.009
3:3049-3071	6mer	0.005
3:2444-2464	8mer	0.004
>ENST00000426200	ENSG00000225733(FGD5-AS1)	hsa-miR-1291	-21	0.782
3:1633-1648	7mer	0.027
3:754-776	6mer	0.003
3:1252-1278	6mer	0.002
>ENST00000424349	ENSG00000225733(FGD5-AS1)	hsa-miR-548t-5p	-21	0.782
3:10-36	6mer	0.01
3:238-251	6mer	0.009
3:178-200	7mer	0.007
3:1091-1106	8mer	0.006
>ENST00000440079	ENSG00000225733(FGD5-AS1)	hsa-miR-4440	-21	0.782
3:405-426	8mer	0.032
>ENST00000426200	ENSG00000225733(FGD5-AS1)	hsa-miR-548f-3p	-21	0.779
3:860-867	8mer	0.013
3:1411-1432	7mer	0.008
3:297-324	6mer	0.004
3:672-694	6mer	0.004
3:1295-1314	6mer	0.003
>ENST00000430166	ENSG00000225733(FGD5-AS1)	hsa-miR-4472	-21	0.779
3:30-46	7mer	0.022
3:901-912	8mer	0.009
>ENST00000440079	ENSG00000225733(FGD5-AS1)	hsa-miR-513a-3p	-21	0.778
3:69-86	8mer	0.028
>ENST00000440079	ENSG00000225733(FGD5-AS1)	hsa-miR-513c-3p	-21	0.778
3:69-86	8mer	0.028
3:1090-1110	6mer	0.004
3:1090-1110	6mer	0.004
>ENST00000440079	ENSG00000225733(FGD5-AS1)	hsa-miR-6724-5p	-21	0.778
3:421-446	7mer	0.022
3:1009-1028	7mer	0.01
>ENST00000424349	ENSG00000225733(FGD5-AS1)	hsa-miR-584-3p	-21	0.776
3:422-442	7mer	0.016
3:3243-3266	7mer	0.011
3:1019-1037	6mer	0.003
3:2542-2560	6mer	0.001
>ENST00000426200	ENSG00000225733(FGD5-AS1)	hsa-miR-3182	-21	0.774
3:1192-1212	8mer	0.031
>ENST00000440079	ENSG00000225733(FGD5-AS1)	hsa-miR-3926	-21	0.771
3:4-13	7mer	0.021
3:1012-1028	7mer	0.009
3:1433-1450	6mer	0.001
>ENST00000424349	ENSG00000225733(FGD5-AS1)	hsa-miR-506-3p	-21	0.771
3:1251-1264	8mer	0.014
3:707-732	7mer	0.009
3:145-168	6mer	0.005
3:3505-3527	6mer	0.002
>ENST00000440079	ENSG00000225733(FGD5-AS1)	hsa-miR-7160-5p	-21	0.771
3:485-507	7mer	0.021
3:1145-1172	7mer	0.004
3:852-867	6mer	0.004
3:818-840	6mer	0.001
>ENST00000426200	ENSG00000225733(FGD5-AS1)	hsa-miR-548f-5p	-21	0.769
3:391-409	7mer	0.011
3:1292-1316	7mer	0.01
3:597-622	7mer	0.005
3:670-692	6mer	0.004
>ENST00000430166	ENSG00000225733(FGD5-AS1)	hsa-miR-6127	-21	0.769
3:585-611	8mer	0.022
3:606-621	7mer	0.008
>ENST00000417835	ENSG00000225733(FGD5-AS1)	hsa-miR-6755-3p	-21	0.769
3:1249-1262	7mer	0.011
3:618-632	7mer	0.007
3:746-771	7mer	0.005
3:1382-1404	6mer	0.004
3:1049-1058	6mer	0.003
>ENST00000430166	ENSG00000225733(FGD5-AS1)	hsa-miR-512-5p	-21	0.768
3:376-402	8mer	0.026
3:221-237	7mer	0.005
>ENST00000417835	ENSG00000225733(FGD5-AS1)	hsa-miR-4775	-21	0.768
3:1211-1230	8mer	0.018
3:156-176	8mer	0.012
>ENST00000426200	ENSG00000225733(FGD5-AS1)	hsa-miR-193b-5p	-21	0.768
3:171-193	8mer	0.028
3:1472-1493	6mer	0.002
>ENST00000417835	ENSG00000225733(FGD5-AS1)	hsa-miR-548o-3p	-21	0.767
3:1307-1329	7mer	0.013
3:684-707	7mer	0.008
3:1082-1104	6mer	0.005
3:473-494	6mer	0.004
>ENST00000424349	ENSG00000225733(FGD5-AS1)	hsa-let-7c-3p	-21	0.766
3:36-41	7mer	0.017
3:127-131	6mer	0.011
3:1327-1346	6mer	0.002
>ENST00000424349	ENSG00000225733(FGD5-AS1)	hsa-miR-3187-5p	-21	0.766
3:3248-3268	7mer	0.02
3:552-566	7mer	0.006
3:537-555	6mer	0.003
3:1525-1546	6mer	0.002
>ENST00000424349	ENSG00000225733(FGD5-AS1)	hsa-miR-8054	-21	0.766
3:1130-1147	8mer	0.022
3:255-277	6mer	0.006
3:959-976	6mer	0.003
>ENST00000430166	ENSG00000225733(FGD5-AS1)	hsa-miR-4447	-21	0.765
3:30-54	7mer	0.019
3:901-912	8mer	0.009
3:785-802	8mer+mismatch	0.002
>ENST00000426200	ENSG00000225733(FGD5-AS1)	hsa-miR-3934-5p	-21	0.765
3:728-745	8mer	0.015
3:214-233	7mer	0.009
3:648-672	7mer	0.007
>ENST00000424349	ENSG00000225733(FGD5-AS1)	hsa-miR-3613-5p	-21	0.765
3:125-142	7mer	0.02
3:2891-2913	7mer	0.005
3:2945-2949	6mer	0.003
3:2642-2666	6mer	0.002
>ENST00000430166	ENSG00000225733(FGD5-AS1)	hsa-miR-7156-5p	-21	0.765
3:967-993	8mer	0.03
>ENST00000440079	ENSG00000225733(FGD5-AS1)	hsa-miR-548aw	-21	0.763
3:59-78	7mer	0.011
3:266-286	7mer	0.008
3:961-987	7mer	0.006
3:590-602	6mer	0.005
>ENST00000426200	ENSG00000225733(FGD5-AS1)	hsa-miR-6891-3p	-21	0.763
3:1268-1289	8mer	0.026
3:100-104	6mer	0.004
>ENST00000424349	ENSG00000225733(FGD5-AS1)	hsa-miR-106a-5p	-21	0.763
3:960-977	8mer	0.012
3:10-33	6mer	0.008
3:254-279	6mer	0.006
3:1092-1115	7mer	0.004
>ENST00000440079	ENSG00000225733(FGD5-AS1)	hsa-miR-4494	-21	0.761
3:76-85	8mer	0.03
>ENST00000417835	ENSG00000225733(FGD5-AS1)	hsa-miR-3934-5p	-21	0.761
3:741-758	8mer	0.014
3:227-246	7mer	0.008
3:661-685	7mer	0.007
>ENST00000426200	ENSG00000225733(FGD5-AS1)	hsa-miR-6131	-21	0.76
3:192-203	8mer	0.02
3:1680-1689	6mer	0.004
3:25-43	6mer	0.003
3:975-992	6mer	0.002
>ENST00000426200	ENSG00000225733(FGD5-AS1)	hsa-miR-548aw	-21	0.76
3:390-409	7mer	0.009
3:1292-1318	7mer	0.007
3:597-617	7mer	0.007
3:921-933	6mer	0.004
3:32-52	6mer	0.004
>ENST00000426200	ENSG00000225733(FGD5-AS1)	hsa-miR-6799-5p	-21	0.76
3:1820-1838	7mer	0.03
>ENST00000426200	ENSG00000225733(FGD5-AS1)	hsa-miR-6508-3p	-21	0.76
3:333-353	7mer	0.012
3:1341-1359	7mer	0.01
3:1508-1525	6mer	0.004
3:752-762	6mer	0.003
>ENST00000424349	ENSG00000225733(FGD5-AS1)	hsa-miR-6891-3p	-21	0.759
3:3177-3198	8mer	0.025
3:1105-1109	6mer	0.003
3:2009-2013	6mer	0.001
>ENST00000424349	ENSG00000225733(FGD5-AS1)	hsa-miR-6773-5p	-21	0.758
3:2660-2686	8mer	0.028
3:1525-1549	6mer	0.001
>ENST00000426200	ENSG00000225733(FGD5-AS1)	hsa-miR-3064-3p	-21	0.758
3:1466-1471	7mer	0.025
3:491-495	6mer	0.005
>ENST00000417835	ENSG00000225733(FGD5-AS1)	hsa-miR-548av-3p	-21	0.758
3:1424-1441	8mer	0.016
3:873-882	7mer	0.006
3:1308-1329	6mer	0.004
3:685-710	6mer	0.003
>ENST00000417835	ENSG00000225733(FGD5-AS1)	hsa-miR-3135b	-21	0.758
3:38-54	8mer	0.022
3:205-232	6mer	0.004
3:124-143	6mer	0.004
>ENST00000430166	ENSG00000225733(FGD5-AS1)	hsa-miR-1249-5p	-21	0.757
3:605-630	8mer	0.013
3:1132-1156	6mer	0.007
3:584-602	8mer	0.006
3:910-934	6mer	0.003
>ENST00000424349	ENSG00000225733(FGD5-AS1)	hsa-miR-5680	-21	0.757
3:2408-2428	8mer	0.012
3:2934-2940	8mer	0.011
3:1616-1633	6mer	0.003
3:1610-1624	7mer	0.002
3:2284-2294	6mer	0.001
>ENST00000424349	ENSG00000225733(FGD5-AS1)	hsa-miR-548d-3p	-21	0.756
3:292-315	6mer	0.006
3:207-231	6mer	0.005
3:487-504	6mer	0.005
3:1752-1766	6mer	0.003
3:2508-2525	6mer	0.002
3:1246-1272	6mer	0.002
3:1122-1139	6mer	0.002
3:2302-2323	6mer	0.001
3:1210-1234	6mer	0.001
3:1696-1703	6mer	0.001
>ENST00000424349	ENSG00000225733(FGD5-AS1)	hsa-miR-548bb-3p	-21	0.755
3:292-315	6mer	0.006
3:207-231	6mer	0.005
3:487-504	6mer	0.005
3:1752-1766	6mer	0.003
3:1246-1267	6mer	0.002
3:2508-2525	6mer	0.002
3:1122-1140	6mer	0.002
3:2302-2323	6mer	0.002
3:1210-1234	6mer	0.001
3:1696-1704	6mer	0.001
>ENST00000430166	ENSG00000225733(FGD5-AS1)	hsa-miR-550a-3-5p	-21	0.755
3:262-273	8mer	0.023
3:733-757	7mer	0.006
>ENST00000430166	ENSG00000225733(FGD5-AS1)	hsa-miR-103a-2-5p	-21	0.755
3:666-689	8mer	0.017
3:700-721	6mer	0.004
3:722-746	6mer	0.003
3:520-539	6mer	0.002
3:1077-1091	6mer	0.002
>ENST00000426200	ENSG00000225733(FGD5-AS1)	hsa-miR-4307	-21	0.755
3:503-520	7mer	0.011
3:1360-1383	7mer	0.009
3:354-371	6mer	0.005
3:1323-1345	6mer	0.004
>ENST00000430166	ENSG00000225733(FGD5-AS1)	hsa-miR-550a-5p	-21	0.754
3:262-273	8mer	0.023
3:733-758	7mer	0.006
>ENST00000430166	ENSG00000225733(FGD5-AS1)	hsa-miR-1250-3p	-21	0.754
3:4-21	7mer	0.016
3:632-658	8mer	0.008
3:963-967	6mer	0.005
>ENST00000440079	ENSG00000225733(FGD5-AS1)	hsa-miR-548o-3p	-21	0.753
3:963-985	7mer	0.011
3:340-363	7mer	0.009
3:129-150	6mer	0.005
3:738-760	6mer	0.004
>ENST00000440079	ENSG00000225733(FGD5-AS1)	hsa-miR-885-5p	-21	0.752
3:140-163	8mer	0.029
>ENST00000426200	ENSG00000225733(FGD5-AS1)	hsa-miR-6072	-21	0.752
3:1267-1291	8mer	0.025
3:100-121	6mer	0.003
>ENST00000430166	ENSG00000225733(FGD5-AS1)	hsa-miR-5088-3p	-21	0.751
3:1040-1058	9mer	0.018
3:653-666	7mer	0.007
3:1002-1019	7mer	0.003
>ENST00000426200	ENSG00000225733(FGD5-AS1)	hsa-miR-6755-3p	-21	0.75
3:605-619	7mer	0.01
3:1236-1249	7mer	0.007
3:733-758	7mer	0.005
3:1369-1391	6mer	0.004
3:1036-1045	6mer	0.003
>ENST00000424349	ENSG00000225733(FGD5-AS1)	hsa-miR-2054	-21	0.75
3:30-43	6mer	0.012
3:3104-3109	7mer	0.008
3:579-602	6mer	0.004
3:2745-2749	6mer	0.003
3:1806-1821	7mer	0.002
>ENST00000426200	ENSG00000225733(FGD5-AS1)	hsa-miR-3653-5p	-21	0.749
3:205-227	7mer	0.008
3:1698-1713	8mer+mismatch	0.007
3:1710-1737	6mer	0.004
3:88-102	6mer	0.004
3:1707-1719	6mer	0.003
3:1713-1738	6mer	0.002
>ENST00000430166	ENSG00000225733(FGD5-AS1)	hsa-miR-1273h-5p	-21	0.749
3:68-86	8mer	0.029
>ENST00000424349	ENSG00000225733(FGD5-AS1)	hsa-miR-3929	-21	0.749
3:1056-1082	8mer	0.027
3:2100-2121	6mer	0.001
>ENST00000426200	ENSG00000225733(FGD5-AS1)	hsa-miR-548a-3p	-21	0.749
3:1411-1428	7mer	0.008
3:860-865	7mer	0.007
3:671-697	7mer	0.005
3:1294-1320	7mer	0.004
3:1069-1091	6mer	0.003
>ENST00000424349	ENSG00000225733(FGD5-AS1)	hsa-miR-8075	-21	0.749
3:964-987	8mer	0.008
3:1297-1317	7mer	0.005
3:1058-1083	6mer	0.004
3:2725-2752	6mer	0.003
3:744-770	6mer	0.003
3:2489-2506	6mer	0.002
3:3058-3078	6mer	0.002
3:3408-3434	6mer	0.001
3:689-713	6mer	0.001
>ENST00000424349	ENSG00000225733(FGD5-AS1)	hsa-miR-4272	-21	0.748
3:641-653	8mer	0.016
3:340-354	7mer	0.01
3:637-651	6mer	0.002
>ENST00000430166	ENSG00000225733(FGD5-AS1)	hsa-miR-6884-5p	-21	0.748
3:72-95	8mer	0.018
3:78-101	8mer	0.011
>ENST00000426200	ENSG00000225733(FGD5-AS1)	hsa-miR-1273f	-21	0.745
3:1668-1687	8mer	0.015
3:165-183	7mer	0.013
>ENST00000424349	ENSG00000225733(FGD5-AS1)	hsa-miR-153-5p	-21	0.743
3:569-586	8mer	0.021
3:1585-1602	7mer	0.003
3:2395-2416	8mer	0.002
3:2475-2495	6mer	0.002
>ENST00000424349	ENSG00000225733(FGD5-AS1)	hsa-miR-5787	-21	0.743
3:768-789	8mer	0.022
3:3416-3439	7mer	0.005
3:2100-2126	6mer	0.001
>ENST00000424349	ENSG00000225733(FGD5-AS1)	hsa-miR-7844-5p	-21	0.743
3:98-121	6mer	0.005
3:3320-3337	6mer	0.004
3:411-424	6mer	0.004
3:3204-3231	6mer	0.003
3:871-888	6mer	0.003
3:1619-1641	7mer	0.003
3:1697-1715	6mer	0.003
3:2769-2780	6mer	0.002
3:2581-2595	6mer	0.002
>ENST00000426200	ENSG00000225733(FGD5-AS1)	hsa-miR-105-5p	-21	0.742
3:78-96	7mer	0.014
3:337-356	7mer	0.011
3:1345-1362	6mer	0.003
>ENST00000424349	ENSG00000225733(FGD5-AS1)	hsa-miR-6512-5p	-21	0.742
3:219-242	7mer	0.02
3:2379-2395	7mer	0.004
3:3299-3314	6mer	0.003
3:2087-2105	6mer	0.001
>ENST00000426200	ENSG00000225733(FGD5-AS1)	hsa-miR-4775	-21	0.741
3:1198-1217	8mer	0.015
3:143-163	8mer	0.013
>ENST00000417835	ENSG00000225733(FGD5-AS1)	hsa-miR-6835-3p	-21	0.741
3:339-365	8mer	0.015
3:1466-1486	7mer	0.01
3:575-591	6mer	0.003
>ENST00000440079	ENSG00000225733(FGD5-AS1)	hsa-miR-548av-3p	-21	0.741
3:1080-1097	8mer	0.015
3:529-538	7mer	0.006
3:341-366	6mer	0.004
3:964-985	6mer	0.003
>ENST00000426200	ENSG00000225733(FGD5-AS1)	hsa-miR-375	-21	0.739
3:1656-1680	7mer	0.021
3:1326-1350	6mer	0.003
3:507-527	6mer	0.003
>ENST00000430166	ENSG00000225733(FGD5-AS1)	hsa-miR-6802-5p	-21	0.739
3:28-47	8mer	0.028
>ENST00000417835	ENSG00000225733(FGD5-AS1)	hsa-miR-193b-5p	-21	0.739
3:184-206	8mer	0.028
>ENST00000417835	ENSG00000225733(FGD5-AS1)	hsa-miR-4494	-21	0.739
3:420-429	8mer	0.028
>ENST00000417835	ENSG00000225733(FGD5-AS1)	hsa-miR-4422	-21	0.737
3:1466-1483	8mer	0.016
3:575-590	7mer	0.007
3:339-348	6mer	0.004
>ENST00000440079	ENSG00000225733(FGD5-AS1)	hsa-miR-3934-5p	-21	0.737
3:397-414	8mer	0.018
3:317-341	7mer	0.01
>ENST00000430166	ENSG00000225733(FGD5-AS1)	hsa-miR-1285-3p	-21	0.736
3:118-138	8mer	0.018
3:67-81	6mer	0.004
3:333-358	6mer	0.003
3:992-1005	6mer	0.002
>ENST00000417835	ENSG00000225733(FGD5-AS1)	hsa-miR-5582-3p	-21	0.736
3:684-700	8mer	0.008
3:1307-1332	7mer	0.007
3:1424-1441	6mer	0.005
3:873-890	6mer	0.004
3:454-480	6mer	0.004
>ENST00000417835	ENSG00000225733(FGD5-AS1)	hsa-miR-6885-3p	-21	0.735
3:1151-1176	8mer	0.012
3:1438-1443	7mer	0.011
3:827-846	6mer	0.004
>ENST00000426200	ENSG00000225733(FGD5-AS1)	hsa-miR-5088-3p	-21	0.735
3:1730-1748	9mer	0.023
3:1692-1709	7mer	0.004
>ENST00000440079	ENSG00000225733(FGD5-AS1)	hsa-miR-539-5p	-21	0.735
3:168-192	7mer	0.015
3:694-714	7mer	0.009
3:411-433	6mer	0.004
>ENST00000424349	ENSG00000225733(FGD5-AS1)	hsa-miR-126-5p	-21	0.735
3:68-88	7mer	0.015
3:221-238	7mer	0.01
3:1647-1659	6mer	0.002
>ENST00000424349	ENSG00000225733(FGD5-AS1)	hsa-miR-6739-5p	-21	0.735
3:628-634	7mer	0.011
3:1349-1369	8mer	0.01
3:170-191	6mer	0.004
3:2845-2860	6mer	0.002
>ENST00000417835	ENSG00000225733(FGD5-AS1)	hsa-miR-105-5p	-21	0.734
3:91-109	7mer	0.014
3:350-369	7mer	0.01
3:1358-1375	6mer	0.003
>ENST00000430166	ENSG00000225733(FGD5-AS1)	hsa-miR-6779-5p	-21	0.734
3:68-87	8mer	0.027
>ENST00000430166	ENSG00000225733(FGD5-AS1)	hsa-miR-6133	-21	0.733
3:606-629	8mer	0.019
3:585-609	7mer	0.008
>ENST00000426200	ENSG00000225733(FGD5-AS1)	hsa-miR-6128	-21	0.733
3:113-126	8mer	0.027
>ENST00000440079	ENSG00000225733(FGD5-AS1)	hsa-miR-5582-3p	-21	0.733
3:340-356	8mer	0.009
3:963-988	7mer	0.005
3:110-136	6mer	0.005
3:1080-1097	6mer	0.004
3:529-546	6mer	0.004
>ENST00000424349	ENSG00000225733(FGD5-AS1)	hsa-miR-548c-3p	-21	0.733
3:207-231	6mer	0.006
3:487-504	6mer	0.005
3:3360-3387	6mer	0.004
3:1246-1267	6mer	0.002
3:2436-2457	7mer	0.002
3:2508-2525	6mer	0.002
3:2302-2323	7mer	0.002
3:1124-1138	6mer	0.002
3:1210-1233	6mer	0.001
3:1239-1262	6mer	0.001
>ENST00000430166	ENSG00000225733(FGD5-AS1)	hsa-miR-92a-2-5p	-21	0.733
3:29-50	7mer	0.016
3:900-925	8mer	0.011
>ENST00000424349	ENSG00000225733(FGD5-AS1)	hsa-miR-514a-5p	-21	0.733
3:396-417	7mer	0.015
3:793-811	8mer+wobble	0.007
3:663-680	7mer	0.006
>ENST00000426200	ENSG00000225733(FGD5-AS1)	hsa-miR-548o-3p	-21	0.732
3:1294-1316	7mer	0.011
3:671-694	7mer	0.008
3:1069-1091	6mer	0.004
3:460-481	6mer	0.004
>ENST00000430166	ENSG00000225733(FGD5-AS1)	hsa-miR-7106-5p	-21	0.732
3:69-88	7mer	0.014
3:1131-1155	6mer	0.008
3:608-627	7mer	0.005
>ENST00000417835	ENSG00000225733(FGD5-AS1)	hsa-miR-3180-5p	-21	0.732
3:418-440	8mer	0.027
>ENST00000424349	ENSG00000225733(FGD5-AS1)	hsa-miR-4646-5p	-21	0.731
3:626-650	8mer	0.021
3:551-566	6mer	0.002
3:1524-1547	6mer	0.002
3:2240-2256	6mer	0.001
3:2157-2174	6mer	0.001
>ENST00000417835	ENSG00000225733(FGD5-AS1)	hsa-miR-6128	-21	0.73
3:126-139	8mer	0.027
>ENST00000440079	ENSG00000225733(FGD5-AS1)	hsa-miR-6781-5p	-21	0.73
3:1488-1507	9mer	0.025
3:1316-1337	6mer	0.002
>ENST00000430166	ENSG00000225733(FGD5-AS1)	hsa-miR-367-5p	-21	0.729
3:388-394	8mer	0.024
3:267-279	6mer	0.003
>ENST00000440079	ENSG00000225733(FGD5-AS1)	hsa-miR-3137	-21	0.729
3:186-206	7mer	0.02
3:863-888	6mer	0.003
3:533-550	6mer	0.003
>ENST00000424349	ENSG00000225733(FGD5-AS1)	hsa-miR-3664-5p	-21	0.728
3:397-419	7mer	0.017
3:664-679	7mer	0.008
3:2462-2489	6mer	0.002
>ENST00000424349	ENSG00000225733(FGD5-AS1)	hsa-miR-323b-3p	-21	0.728
3:3373-3396	8mer	0.025
3:2593-2606	6mer	0.001
>ENST00000424349	ENSG00000225733(FGD5-AS1)	hsa-miR-606	-21	0.725
3:311-326	8mer	0.016
3:98-124	6mer	0.005
3:1620-1632	6mer	0.003
3:2342-2354	6mer	0.002
>ENST00000417835	ENSG00000225733(FGD5-AS1)	hsa-miR-6131	-21	0.724
3:205-216	8mer	0.02
3:38-56	6mer	0.004
3:988-1005	6mer	0.002
>ENST00000440079	ENSG00000225733(FGD5-AS1)	hsa-miR-548c-3p	-21	0.723
3:196-217	7mer	0.009
3:62-83	7mer	0.008
3:268-285	6mer	0.005
3:1120-1146	6mer	0.004
>ENST00000440079	ENSG00000225733(FGD5-AS1)	hsa-miR-3606-3p	-21	0.723
3:70-81	7mer	0.015
3:64-84	6mer	0.005
3:1091-1100	6mer	0.004
3:659-676	6mer	0.003
>ENST00000430166	ENSG00000225733(FGD5-AS1)	hsa-miR-6744-5p	-21	0.723
3:271-290	8mer	0.026
>ENST00000424349	ENSG00000225733(FGD5-AS1)	hsa-miR-5096	-21	0.723
3:3033-3045	7mer	0.014
3:2752-2768	9mer	0.007
3:897-921	6mer	0.003
3:2083-2102	8mer+mismatch	0.001
>ENST00000417835	ENSG00000225733(FGD5-AS1)	hsa-miR-4640-5p	-21	0.722
3:1354-1374	7mer	0.013
3:346-361	7mer	0.01
3:765-790	6mer	0.003
>ENST00000417835	ENSG00000225733(FGD5-AS1)	hsa-miR-203b-3p	-21	0.722
3:1409-1429	7mer	0.017
3:213-230	7mer	0.009
>ENST00000426200	ENSG00000225733(FGD5-AS1)	hsa-miR-1250-3p	-21	0.722
3:566-579	7mer	0.01
3:1653-1657	6mer	0.008
3:1392-1396	6mer	0.005
3:485-496	7mer	0.004
>ENST00000426200	ENSG00000225733(FGD5-AS1)	hsa-miR-203b-3p	-21	0.721
3:1396-1416	7mer	0.017
3:200-217	7mer	0.009
>ENST00000424349	ENSG00000225733(FGD5-AS1)	hsa-miR-548g-3p	-21	0.721
3:2769-2776	9mer	0.008
3:3320-3337	7mer	0.007
3:871-888	6mer	0.003
3:3204-3227	6mer	0.003
3:1697-1715	6mer	0.003
3:2581-2606	6mer	0.002
3:1453-1477	6mer	0.002
>ENST00000424349	ENSG00000225733(FGD5-AS1)	hsa-miR-3972	-21	0.721
3:185-210	7mer	0.018
3:778-803	7mer	0.007
3:970-988	6mer	0.001
>ENST00000426200	ENSG00000225733(FGD5-AS1)	hsa-miR-378a-5p	-21	0.721
3:205-226	8mer	0.022
3:88-105	6mer	0.004
>ENST00000424349	ENSG00000225733(FGD5-AS1)	hsa-miR-6733-5p	-21	0.72
3:1349-1370	8mer	0.01
3:628-654	7mer	0.01
3:170-194	6mer	0.004
3:2845-2862	6mer	0.002
>ENST00000417835	ENSG00000225733(FGD5-AS1)	hsa-miR-548g-3p	-21	0.72
3:873-880	9mer	0.011
3:1424-1441	7mer	0.008
3:1308-1331	6mer	0.004
3:685-710	6mer	0.003
>ENST00000417835	ENSG00000225733(FGD5-AS1)	hsa-miR-539-5p	-21	0.719
3:512-536	7mer	0.012
3:1038-1058	7mer	0.011
3:755-777	6mer	0.003
>ENST00000430166	ENSG00000225733(FGD5-AS1)	hsa-miR-4685-3p	-21	0.719
3:651-667	9mer	0.018
3:1001-1017	8mer	0.003
3:233-250	6mer	0.003
3:523-542	6mer	0.001
3:830-854	8mer+wobble	0.001
3:834-854	8mer+wobble	0.001
>ENST00000417835	ENSG00000225733(FGD5-AS1)	hsa-miR-939-3p	-21	0.718
3:1352-1371	8mer	0.026
>ENST00000417835	ENSG00000225733(FGD5-AS1)	hsa-miR-6508-3p	-21	0.718
3:1354-1372	7mer	0.013
3:346-366	7mer	0.011
3:765-775	6mer	0.003
>ENST00000426200	ENSG00000225733(FGD5-AS1)	hsa-miR-4640-5p	-21	0.717
3:333-348	7mer	0.012
3:1341-1361	7mer	0.012
3:752-777	6mer	0.003
>ENST00000430166	ENSG00000225733(FGD5-AS1)	hsa-miR-4510	-21	0.717
3:585-605	8mer	0.018
3:606-628	7mer	0.008
>ENST00000426200	ENSG00000225733(FGD5-AS1)	hsa-miR-6835-3p	-21	0.717
3:326-352	8mer	0.015
3:1453-1470	7mer	0.009
3:562-578	6mer	0.003
>ENST00000426200	ENSG00000225733(FGD5-AS1)	hsa-miR-548e-3p	-21	0.716
3:1411-1428	7mer	0.009
3:860-868	7mer	0.007
3:297-317	6mer	0.004
3:672-694	6mer	0.003
3:1295-1317	6mer	0.002
>ENST00000440079	ENSG00000225733(FGD5-AS1)	hsa-miR-6885-3p	-21	0.716
3:807-832	8mer	0.009
3:1094-1099	7mer	0.008
3:483-502	6mer	0.005
3:1207-1228	6mer	0.003
>ENST00000426200	ENSG00000225733(FGD5-AS1)	hsa-miR-590-3p	-21	0.715
3:417-442	7mer	0.009
3:144-163	7mer	0.009
3:1198-1224	7mer	0.008
>ENST00000417835	ENSG00000225733(FGD5-AS1)	hsa-miR-3187-5p	-21	0.715
3:1352-1372	7mer	0.026
>ENST00000424349	ENSG00000225733(FGD5-AS1)	hsa-miR-3149	-21	0.714
3:608-623	7mer	0.014
3:2060-2083	7mer	0.006
3:2893-2918	6mer	0.003
3:2586-2606	6mer	0.002
>ENST00000424349	ENSG00000225733(FGD5-AS1)	hsa-miR-374b-3p	-21	0.714
3:297-315	7mer	0.014
3:3239-3250	7mer	0.011
>ENST00000424349	ENSG00000225733(FGD5-AS1)	hsa-miR-204-3p	-21	0.714
3:627-650	7mer	0.012
3:2156-2181	7mer	0.007
3:3417-3444	7mer	0.004
3:770-789	6mer	0.003
>ENST00000440079	ENSG00000225733(FGD5-AS1)	hsa-miR-4680-5p	-21	0.714
3:221-241	8mer	0.019
3:1067-1093	6mer	0.006
>ENST00000426200	ENSG00000225733(FGD5-AS1)	hsa-miR-4422	-21	0.713
3:1453-1470	8mer	0.014
3:562-577	7mer	0.007
3:326-335	6mer	0.004
>ENST00000440079	ENSG00000225733(FGD5-AS1)	hsa-miR-6891-3p	-21	0.713
3:937-958	8mer	0.026
>ENST00000424349	ENSG00000225733(FGD5-AS1)	hsa-miR-380-3p	-21	0.713
3:28-46	7mer	0.021
3:2744-2758	7mer	0.004
>ENST00000430166	ENSG00000225733(FGD5-AS1)	hsa-miR-30b-3p	-21	0.712
3:68-94	8mer	0.026
>ENST00000440079	ENSG00000225733(FGD5-AS1)	hsa-miR-548e-3p	-21	0.712
3:1080-1097	7mer	0.011
3:529-537	7mer	0.009
3:341-363	6mer	0.004
3:964-986	6mer	0.002
>ENST00000424349	ENSG00000225733(FGD5-AS1)	hsa-miR-3686	-21	0.712
3:3103-3128	7mer	0.011
3:577-588	9mer	0.007
3:666-679	6mer	0.003
3:785-807	7mer	0.002
3:1338-1362	6mer	0.002
3:1314-1335	6mer	0.001
>ENST00000424349	ENSG00000225733(FGD5-AS1)	hsa-miR-6781-5p	-21	0.712
3:3751-3770	9mer	0.024
3:3579-3600	6mer	0.002
>ENST00000440079	ENSG00000225733(FGD5-AS1)	hsa-miR-6851-3p	-21	0.712
3:423-445	8mer	0.023
3:921-939	6mer	0.002
>ENST00000426200	ENSG00000225733(FGD5-AS1)	hsa-miR-6739-3p	-21	0.712
3:1657-1678	7mer	0.022
3:345-356	6mer	0.004
>ENST00000426200	ENSG00000225733(FGD5-AS1)	hsa-miR-513a-3p	-21	0.711
3:400-417	8mer	0.022
>ENST00000426200	ENSG00000225733(FGD5-AS1)	hsa-miR-513c-3p	-21	0.711
3:400-417	8mer	0.022
3:1421-1441	6mer	0.003
3:1421-1441	6mer	0.003
>ENST00000424349	ENSG00000225733(FGD5-AS1)	hsa-miR-4505	-21	0.711
3:769-784	7mer	0.012
3:3416-3438	7mer	0.007
3:1056-1069	6mer	0.004
3:2100-2119	7mer	0.002
3:1933-1948	7mer	0.001
>ENST00000424349	ENSG00000225733(FGD5-AS1)	hsa-miR-548ad-3p	-21	0.711
3:2979-3000	7mer	0.008
3:215-231	6mer	0.007
3:3319-3337	6mer	0.004
3:1618-1644	6mer	0.004
3:2768-2774	6mer	0.003
>ENST00000430166	ENSG00000225733(FGD5-AS1)	hsa-miR-1271-3p	-21	0.71
3:262-284	8mer	0.02
3:733-759	7mer	0.006
>ENST00000417835	ENSG00000225733(FGD5-AS1)	hsa-miR-4663	-21	0.71
3:830-846	7mer	0.02
3:1197-1221	6mer	0.005
>ENST00000417835	ENSG00000225733(FGD5-AS1)	hsa-miR-378a-5p	-21	0.71
3:218-239	8mer	0.022
3:101-118	6mer	0.003
>ENST00000424349	ENSG00000225733(FGD5-AS1)	hsa-miR-548t-3p	-21	0.71
3:216-231	7mer	0.014
>ENST00000424349	ENSG00000225733(FGD5-AS1)	hsa-miR-548aa	-21	0.71
3:216-231	7mer	0.014
3:292-318	6mer	0.006
3:292-318	6mer	0.006
3:1168-1194	6mer	0.003
3:1168-1194	6mer	0.003
3:1752-1777	6mer	0.002
3:1752-1777	6mer	0.002
>ENST00000426200	ENSG00000225733(FGD5-AS1)	hsa-miR-129-5p	-21	0.708
3:488-505	7mer	0.007
3:149-172	6mer	0.006
3:915-934	6mer	0.005
3:1121-1143	6mer	0.003
3:1429-1439	6mer	0.003
3:911-934	6mer	0.001
>ENST00000440079	ENSG00000225733(FGD5-AS1)	hsa-miR-548g-3p	-21	0.708
3:529-536	9mer	0.011
3:1080-1097	7mer	0.007
3:341-366	6mer	0.004
3:964-987	6mer	0.003
>ENST00000417835	ENSG00000225733(FGD5-AS1)	hsa-miR-7160-5p	-21	0.708
3:829-851	7mer	0.019
3:1196-1211	6mer	0.005
3:1162-1184	6mer	0.002
>ENST00000430166	ENSG00000225733(FGD5-AS1)	hsa-miR-3689c	-21	0.708
3:68-87	8mer	0.025
>ENST00000430166	ENSG00000225733(FGD5-AS1)	hsa-miR-3689b-3p	-21	0.708
3:68-87	8mer	0.025
>ENST00000426200	ENSG00000225733(FGD5-AS1)	hsa-miR-4440	-21	0.708
3:736-757	8mer	0.025
>ENST00000426200	ENSG00000225733(FGD5-AS1)	hsa-miR-1199-3p	-21	0.708
3:1785-1805	7mer	0.015
3:1614-1639	6mer	0.008
3:1539-1557	8mer	0.003
>ENST00000424349	ENSG00000225733(FGD5-AS1)	hsa-miR-593-5p	-21	0.707
3:1252-1276	8mer	0.02
3:3012-3038	7mer	0.005
>ENST00000424349	ENSG00000225733(FGD5-AS1)	hsa-miR-651-3p	-21	0.707
3:211-233	8mer	0.025
>ENST00000424349	ENSG00000225733(FGD5-AS1)	hsa-miR-4524a-3p	-21	0.707
3:1910-1930	8mer	0.025
>ENST00000440079	ENSG00000225733(FGD5-AS1)	hsa-miR-5096	-21	0.707
3:793-805	7mer	0.014
3:512-528	9mer	0.011
>ENST00000430166	ENSG00000225733(FGD5-AS1)	hsa-miR-4419a	-21	0.706
3:606-618	8mer	0.017
3:585-602	7mer	0.009
>ENST00000424349	ENSG00000225733(FGD5-AS1)	hsa-miR-3152-3p	-21	0.706
3:3259-3277	7mer	0.011
3:680-701	7mer	0.006
3:1177-1182	7mer	0.005
3:481-500	6mer	0.003
>ENST00000426200	ENSG00000225733(FGD5-AS1)	hsa-miR-6832-5p	-21	0.706
3:162-187	8mer	0.025
>ENST00000417835	ENSG00000225733(FGD5-AS1)	hsa-miR-590-3p	-21	0.705
3:1211-1237	7mer	0.009
3:430-455	7mer	0.009
3:157-176	7mer	0.008
>ENST00000417835	ENSG00000225733(FGD5-AS1)	hsa-miR-4440	-21	0.704
3:749-770	8mer	0.025
>ENST00000426200	ENSG00000225733(FGD5-AS1)	hsa-miR-3173-3p	-21	0.704
3:1835-1849	9mer	0.025
>ENST00000430166	ENSG00000225733(FGD5-AS1)	hsa-miR-6130	-21	0.704
3:585-604	8mer	0.017
3:606-614	7mer	0.008
>ENST00000424349	ENSG00000225733(FGD5-AS1)	hsa-miR-548ap-3p	-21	0.703
3:216-221	7mer	0.014
3:292-316	6mer	0.006
3:1168-1190	6mer	0.003
3:1752-1756	6mer	0.002
>ENST00000440079	ENSG00000225733(FGD5-AS1)	hsa-miR-6072	-21	0.702
3:936-960	8mer	0.025
